1 **Anticipating the risk and spatial spread of measles in populations**  
2 **with high MMR uptake: using school-household networks to**  
3 **understand the 2013 - 2014 outbreak in the Netherlands.**

4 James D Munday<sup>1,2,3\*</sup>, Katherine E Atkins<sup>1,2,4</sup>, Don Klinkenberg<sup>5</sup>, Marc Meurs<sup>6</sup>, Erik Fleur<sup>6</sup>, Susan  
5 Hahne<sup>5</sup>, Jacco Wallinga<sup>5,7</sup>, Albert Jan van Hoek<sup>1,2,5</sup>

6 1 Centre for mathematical modelling of infectious diseases, London School of Hygiene and Tropical  
7 Medicine, United Kingdom

8 2 Department of infectious disease epidemiology, London School of Hygiene and Tropical Medicine,  
9 United Kingdom

10 3 Department of Biosystems Science and Engineering, ETH Zürich, Switzerland

11 4 Usher Institute, College of Medicine and Veterinary Medicine, University of Edinburgh, United Kingdom

12 5 National Institute for Public Health and the Environment (RIVM), The Netherlands

13 6 Education Executive Agency (DUO), The Netherlands

14 7 Department of Biomedical Data Sciences, Leiden University Medical Centre, Leiden, the Netherlands.

15 \* james.munday@bsse.ethz.ch

16

17

18 Abstract:

19 Measles outbreaks are still routine, even in countries where vaccination coverage exceeds the  
20 guideline of 95%. Therefore, achieving ambitions for measles eradication will require  
21 understanding how unvaccinated children interact with others who are unvaccinated. Here we  
22 propose a novel framework for modelling measles transmission to better understand outbreaks  
23 in high uptake situations.

24 The high importance of school- and home-based transmission to overall outbreak dynamics is  
25 well established. Making use of this, we created a network of all primary and secondary schools  
26 in the Netherlands based on the total number of household pairs between each school. A  
27 household pair are siblings from the same household who attend a different school. We  
28 parameterised the network with individual level administrative household data provided by the  
29 Dutch Ministry for Education and estimates of school level uptake of the Mumps, Measles and  
30 Rubella (MMR) vaccine. We analyse the network to establish the relative strength of contact  
31 between schools. We simulated measles outbreaks on the network and evaluated the model  
32 against empirical measles data per postcode-area from a large outbreak in 2013 (2766 cases),  
33 comparing the model to alternative models that do not account for specific network structure or  
34 school-level vaccine uptake.

35 Our network analysis shows that schools associated with low vaccine uptake are highly  
36 connected, particularly Orthodox-Protestant schools (Coleman Homophily Index = 0.63).  
37 Simulations on the Network were able to reproduce the observed size and spatial distribution of  
38 the historic outbreak much more clearly than the alternative models, with a case weighted  
39 Receiver Operating Condition sensitivity of 0.94 for the data-driven network model and 0.38 and  
40 0.23 for the alternative models. Further, we establish that variation in local network properties

41 result in clear differences in final size of outbreaks seeded in orthodox-protestant-affiliated and  
42 other schools with low MMR coverage.

43 Our framework indicates that clustering of unvaccinated children in primary schools connected  
44 by unvaccinated children in related secondary schools lead to large, connected clusters of  
45 unvaccinated children. Using our approach, we could explain historical outbreaks on a spatial  
46 level. Our framework could be further developed to aid future outbreak response.

47 **Introduction:**

48 The World Health Organization has outlined ambitious goals for eliminating measles [1]. Despite  
49 the effectiveness of the Measles, Mumps, and Rubella (MMR) vaccine, estimates suggest that  
50 about 95 percent of the population needs to be vaccinated to achieve herd immunity, which is a  
51 level that prevents widespread disease transmission [2–5]. However, many countries are facing  
52 challenges due to increasing numbers of unvaccinated children. This rise is driven by parental  
53 hesitancy towards vaccines and reduced MMR vaccination rates during and after the COVID-19  
54 pandemic [6,7].

55 Interestingly, even in countries where more than 95 percent of people have received at least one  
56 dose of the MMR vaccine, measles outbreaks still occur. This is because the traditional concept  
57 of herd immunity assumes that vaccines are distributed evenly throughout the population [8]. In  
58 reality, vaccine hesitancy tends to cluster within specific social groups [9], underscoring the need  
59 to understand how unvaccinated children interact with each other [10]. Apart from hindering efforts  
60 to eliminate measles, these outbreaks pose immediate risks to vulnerable populations, including  
61 young children who can't yet receive vaccinations and people with certain medical conditions.

62 This phenomenon of clustering in vaccine hesitancy within social groups is particularly clear in  
63 the Netherlands, where members of the Orthodox Protestant Church and the Anthroposophic  
64 community tend to have lower MMR vaccine uptake [11,12]. This clustering of susceptible children  
65 has given-way to a number of measles outbreaks since introduction of MMR vaccine in 1989 with  
66 the largest occurring in 1999 and 2013, each of these with an estimated total infection count of c.  
67 30,000 with large portions of the country affected [13], in both outbreaks the majority of infections  
68 reported were in children, with 77% of cases in 2013/14 amongst 4 to 17 year olds [14].

69 In the Netherlands, over two-thirds of schools are associated with one of 27 denominations, most  
70 of which have religious or philosophical affiliations. An analysis of vaccine coverage in Dutch

71 schools in 2013 showed that schools linked to two specific denominations – Anthroposophic and  
72 Orthodox Protestant – had a higher concentration of unvaccinated children who had received at  
73 least one dose of the MMR vaccine [15]. This finding aligns with recent outbreaks, however,  
74 variation in outbreak sizes [16–20] suggest that factors beyond clustering of unvaccinated children  
75 within schools also influence outbreak risks. Concretely, clustering of unvaccinated children within  
76 individual schools can explain the smaller locally concentrated outbreaks like the outbreak in  
77 Anthroposophic schools in 2008 [17], but is not sufficient to explain the very large and  
78 geographically disparate outbreaks witnessed in 1999 and 2013 [14,21].

79 We suggest that focusing solely on vaccine uptake within schools overlooks the potential impact  
80 of interactions among unvaccinated siblings. Families may choose schools based on shared  
81 affiliations, leading to larger clusters of susceptible individuals that cover broader geographical  
82 areas than just single school boundaries. To understand this clustering better and assess its  
83 implications for larger outbreaks, we propose a method that examines connections between  
84 schools and households using national school registration data. This approach builds on previous  
85 research showing that households and schools are primary locations for close and lasting  
86 contacts, which play a significant role in disease transmission [22,23]. We have previously shown  
87 the effectiveness of using school-household data to study how the structure of the education  
88 system relates to the spread of infectious diseases among school-age children [24]. This  
89 approach's reliability has also been confirmed through analysing data related to COVID-19 in the  
90 Netherlands [25].

91 Similarly to Munday et. al. 2021 [24] we construct a comprehensive network that links schools  
92 and households with unvaccinated individuals. For this we have used data from the Dutch Ministry  
93 of Education to establish household connections between schools. We first analysed the network  
94 to establish the connectedness of schools with the same affiliations by quantifying homophily  
95 indices, comparing networks with geographical distances between schools and by evaluating the

96 nature of clusters identified using community detection. We then extended our approach to  
97 include vaccination informed by vaccine uptake estimates at the school level from Klinkenberg et.  
98 al. [15], we can better understand how unvaccinated children interact. To validate the usefulness  
99 of this network for assessing outbreak risks and their potential impact, we simulated measles  
100 outbreaks within this network and compared the results to a real outbreak that occurred in the  
101 Netherlands in 2013/14 [13]. To assess the robustness of this combined network we compare our  
102 results with two alternative combined network structures, the first in which MMR uptake is not  
103 clustered by school but by postcode, and the second schools are not clustered based on school-  
104 households contacts but based on geographical distance.

## 105 **Methods:**

### 106 *School network*

107 To construct a network of schools as connected through household contacts (Figure 1A) using  
108 the approach we described in Munday et al. 2021 [24], we used government data to calculate the  
109 total number of unique contact pairs between schools for the reference date of 1<sup>st</sup> October 2013  
110 (the year of the last major measles outbreak in the Netherlands). The Ministry of Education (Dienst  
111 Uitvoering Onderwijs, DUO) holds data on school attendance for each child in non-private  
112 education for the Netherlands (>99% of school aged children). From these data, the ministry  
113 calculated the number of children per individual school at each unique address (irrespective of  
114 class, age and gender). For each unique address, based on the number of children per school,  
115 the number of unique contact pairs between each pair of schools represented in that address was  
116 calculated, where a contact pair is a pair of students who live in the same address but attend  
117 different schools (for example 2 children school A and 2 children school B form  $2 \times 2 = 4$  unique  
118 contact pairs between school A and B) (Figure 1B). Subsequently, for each pair of schools in the  
119 data, we calculated the total number of contacts across all addresses, resulting in a total number

120 of unique contact pairs between each pair of schools (for example 46 contact pairs between  
121 school A and B). In this calculation, schools are defined as school-locations identified by their  
122 location number in the DUO database. Therefore, we distinguish between the multiple  
123 (geographical) school buildings/locations even though they belong to the same school  
124 administration.

#### 125 *School data*

126 The denomination (see table in supplementary material), the total number of students per school  
127 (also on October 2013) and the catchment of each school, the number of students per 4-digit  
128 postcode (PC4) was obtained from open source education data [26]—Dutch postcodes are an  
129 alphanumeric code of four digits followed by two letters. The exact geographical location of each  
130 school was obtained from the full address and postcode of the school site.

#### 131 *Community structure in the school network*

132 Firstly, to evaluate the connectedness of schools irrespective of denomination, we evaluated the  
133 community structure within the school network. Communities represent groups of schools that are  
134 more connected to each other than to other schools on the network. For this we used the  
135 modularity maximisation based Leiden algorithm, implemented in the *leidenalg* python package  
136 [27]. This approach partitions the network such that groups of schools are identified, which are  
137 more connected to each other than schools that belong to other groups. The size of the groups  
138 detected by the leiden algorithm can be adjusted using the resolution parameter—the higher the  
139 value of resolution parameter, the smaller the communities detected (Supplementary material).  
140 We first evaluated partitions made using different values of the resolution parameter. To establish  
141 the most meaningful scale of communities, we partitioned the network with values of resolution  
142 between 0.1 and 1. We evaluated the partitions against four metrics: *Internal edge density*[28],  
143 *Modularity density* [29], *Neman Girvan modularity* [30] and *Surprise*[31], for details see

144 supplementary material. We established that a resolution parameter of 1 gave the best score in  
145 all metrics and therefore proceeded with this for the further analysis. To establish a consensus  
146 partition we generated 20 partitions of the network. From the partitions we calculated a similarity  
147 matrix, where each element was equal the the frequency with which each pair of schools was  
148 partitioned into the same community. We repeated the process again but instead partitioned the  
149 network described by the similarity matrix. We repeated this process until all 20 partitions were  
150 identical, we present this partition as the consensus partition. We evaluated each stage of the  
151 process by calculating the normalised mutual information of each pair of partitions. We then  
152 evaluated the composition of each of the communities in the consensus partition.

153 To evaluate patterns by geographical location and affiliated denomination in the initially generated  
154 partitions, we calculated the mean pairwise probability that any two schools of the same particular  
155 denomination or province fall into the same community over the partitioned networks, giving the  
156 propensity for schools of particular denominations to form communities in the network.

### 157 *Network analysis*

158 We explicitly evaluated the relative connectedness of schools with other schools of the same  
159 denomination on the network by calculating the Basic Homophily ( $H_i$ ) and Coleman Homophily  
160 Index ( $IH_i$ ) [32]; equations 1 and 2) of each school denomination This measure gives the  
161 proportion of neighbouring schools that are of the same identity relative to the prevalence of the  
162 identity in the school system.

$$163 \quad H_i = \frac{s_i}{s_i + d_i} \quad (1)$$

$$164 \quad IH_i = \frac{H_i - w_i}{1 - w_i} \quad (2)$$

165



166 Where,  $s_i$  is the number of connections between schools in denomination  $i$ ,  $d_i$  is the total number  
167 of connections between schools in denomination  $i$  and any other school in the network. and  $w_i$  is  
168 the proportion of schools in the network that belong to denomination  $i$ .

169 To explore longer-range connections in the network, we compared geographical and network  
170 distance between pairs of schools in the network, similarly to previous work by Donker et al[33]  
171 studying hospital networks. Network distance was defined as the length of the shortest path  
172 between schools on the reciprocal contact network. The weights of the edges in the reciprocal  
173 network are equal to the reciprocal of the number of unique contact pairs between schools. The  
174 network distance between two schools is therefore the lowest possible sum of edges that form a  
175 path between the schools on the reciprocal network (Figure 1 C). I.e.  $\sum_{i=1}^{N_{path}-1} \frac{1}{C_{i+1,i}}$  where  $C_{i+1,i}$   
176 is the number of contact pairs between consecutive schools  $i$  and  $i+1$  in a shortest path of  $N_{path}$   
177 edges.

178 We calculated the network distance (distance ratio) and geographic distance (km) of 1000  
179 randomly sampled pairs of schools from the biggest faith-based school denominations in the  
180 Netherlands: Roman Catholic (Rooms-katholic) and mainstream Protestant (Protestants-  
181 Christelijk). We also calculated the distances for Orthodox-Protestant and Anthroposophic  
182 (Antroposofisch) faith identities, which are most closely associated with low vaccination uptake.

183 Schools with a low distance ratio are more closely connected on the network relative to their  
184 geographic distance than schools with higher distance ratios. We calculated distance ratios for  
185 pairs of schools of the same faith identity to that of schools in the rest of the network, defined as  
186 all schools not associated with that faith identity. To account for geographic location of schools,  
187 we compared distance ratios for schools sampled from the 'rest of the network' from the same  
188 two-digit postcode area as each school sampled from the denomination of interest.

189 *Transmission model*

190 In addition to our analysis of the network of schools, we evaluated the epidemiological relevance  
191 of any increased connectedness between schools, specifically concerning outbreaks of measles.  
192 We used the network to simulate outbreaks of measles in school-aged children (supplementary  
193 information). We extended the method used in Munday et al. [24] to include vaccination. In a  
194 generation-based model, each school could be in one of three epidemiological states:  
195 Susceptible, Infected or recovered. Schools in the susceptible state had immunity amongst its  
196 pupils equal to the complement of the estimated vaccination coverage ( $V_j$ ) in that school in  
197 October 2013 calculated by Klinkenberg et al [15] (Figure S3). When a school becomes infected,  
198 the total outbreak size within this school is obtained by a final size equation [34] (equation 3)  
199 considering the total number of students, the number of susceptibles and  $R_0$ .

$$200 \quad R_j(\infty) = (1 - V_j)(1 - e^{-(1-V_j)R_0R(\infty)}) \quad (3)$$

201 Subsequently an infected school,  $j$ , can infect connected school,  $i$ , with probability  $P_{trans,ij}$   
202 depending on the number of contact pairs ( $C_{ij}$ ), the probability that a contact from the infected is  
203 infected ( $P_j^I$ ) (based on the final outbreak size), the percentage susceptible in the connected  
204 school,  $P_i^S$ , and the probability that introducing an infected child into the susceptible school would  
205 lead to an outbreak ( $P_i^{OB}$ ) (see supplementary material for full description).

$$206 \quad P_{trans,ij} = 1 - (1 - P_j^I P_i^S q P_i^{OB})^{C_{ij}} \quad (4)$$

207  
208 For our application, we have assumed a gaussian offspring distribution for within-school  
209 transmission, hence  $P_i^{OB}$  is equal to  $P_i^I$ . Outbreaks were simulated from an initial state, where one  
210 or more schools were in the infected state and the remaining schools were in the susceptible  
211 state. We set the “within school” reproduction number ( $R_0$ ) to 15, consistent with estimates for  
212 measles (12-18) [35] and the probability of transmission to a susceptible sibling ( $q$ ) of 0.5.

## 213 *Alternative network models*

214 To evaluate the importance of the specific connectedness in the school network and vaccination  
215 at school level to the simulated outbreaks, we designed alternative models which contained only  
216 part of the information used in the full model (Figure 1 D).

217 “Alternative model 1” was designed to establish the importance of clustering of unvaccinated  
218 children in particular schools. We analysed an alternative parameterization assuming children  
219 had a probability of being vaccinated equal to the vaccine uptake of the PC4 where they lived.  
220 We used data on the residence of children in each school to calculate the proportion of children  
221 in each school who live in each PC4. School vaccination uptake was set as the weighted average  
222 of vaccination uptake at PC4 level, weighted by the proportion of children who live in each PC4.

223 We included “alternative model 2” to assess the importance of the specific network structure  
224 defined by the school data to the overall dynamics of outbreaks. We constructed an alternative  
225 school contact network where the geographic distance between connected schools followed a  
226 similar relationship to the baseline model, however contact is spread evenly over all schools  
227 according to that relationship. The spatial distribution of a school's immediate neighbours in the  
228 data-based school network can be described by an exponential distribution. We therefore used  
229 this relationship and weighted by the degree of the connecting schools to describe the spatial  
230 relationship for alternative model 2. To calibrate the spatial model, we matched the distribution of  
231 distance between schools connected by contact pairs to the school data derived network (Details  
232 in the supplementary material).

233

## 234 *Outbreak simulations*

235 In our model each school can occupy one of three states: susceptible, infected, or recovered.  
236 Susceptible schools are represented as initially described on the transmission probability network,

237 with immunity profile equal to  $1 - V$ . Infected schools are those affected by an outbreak, and  
238 have a probability of infecting neighbouring susceptible schools ( $P_{trans,i,j}$ ) as defined above. After  
239 an outbreak occurred, we assumed that the school had effectively depleted its susceptible  
240 population, entering the recovered state where the school could not be re-infected. For each  
241 iteration of the model we sampled a set of vaccine uptake values (per school) from the  
242 distributions given by Klinkenberg et. al (2022). For each sample the values of  $P_{trans,i,j}$  collectively  
243 form a static directed network of transmission probabilities. To create outbreak realisations, we  
244 sampled edges of an equivalent network where edges have a weight of 1 with probability  $P_{trans,i,j}$   
245 . These binary directed networks represent paths along which transmission can occur in the  
246 simulation. For each realisation of an outbreak, one or more schools were set to be in the infected  
247 state, outbreaks were then described by trees described by the successive out-edges of the  
248 binary network.

249

#### 250 *Evaluating the model against epidemiological data*

251 To evaluate the ability of the network-based simulations to capture observed measles  
252 epidemiology, we compared simulated outbreaks to final estimates of cases from a large outbreak  
253 in 2013/14. To do so, the cumulative measles cases per PC4 for the 2013 - 2014 were obtained  
254 from the National registry of reportable infectious disease (OSIRIS).

255 Simulations of the outbreak were initiated by placing the two schools, which are believed to be  
256 the index-schools in the outbreak of 2013/14, in the infected state. All other schools were initiated  
257 in the susceptible state. We calculated the total number of students expected to be infected per  
258 school by multiplying the final size proportion estimate by the number of students in the school.  
259 Then we allocated infected students proportionally to PC4-areas, based on the proportion of  
260 children in each school that live in each PC4 area, which allowed us to compare the simulated  
261 outbreaks to the observed historical outbreak. We ran the model 10,000 times and calculated the

262 mean number of cases per PC4 area over all realisations of the simulation. Average model  
263 outcomes were compared using Receiver Operating Characteristic (ROC) on PC4-level, based  
264 on the presence or absence of cases. To reflect the relative importance of PC4s with higher  
265 reported or simulated incidence, we also calculated a weighted ROC (wROC). For this measure,  
266 when calculating sensitivity, each PC4 with cases reported is weighted by the proportion of all  
267 cases reported in that PC4. Hence, whereas for the unweighted ROC the sensitivity value is the  
268 proportion of areas with cases reported that also had cases predicted, for the wROC the sensitivity  
269 value is the proportion of cases reported that occurred within PC4s where cases were predicted  
270 by the model.

#### 271 *Evaluating the risk of outbreak posed by each school*

272 We used the transmission model described above to evaluate the relative risk an outbreak  
273 originating in each school poses to the network as a whole. To quantify this risk, we simulated (as  
274 described above) 1000 outbreaks initiated at each school in the network and reported the mean  
275 number of schools and children infected.

276 To establish the relevance of the specific schools independent of their vaccine status we present  
277 the number of schools and children infected by a school by that school's vaccine uptake. To  
278 evaluate the sensitivity of these results to the network structure, we compared results from our  
279 transmission model with those of Alternative Model 2 (with a spatially-derived network).

280 All analysis was performed in Python 3 [36]. Network analysis was performed using NetworkX  
281 [37], community detection was performed using the Leidenalg [27] package and evaluation of the  
282 partitions was performed using the CDLIB [38] package. All other analyses made use of the  
283 scientific python package library [39].

#### 284 **Results:**

285 *Communities in the network*

286 We found that the algorithm converged on a consensus partition after two rounds (Figure 2), this  
287 attests to the stability of the initial set of partitions. Indeed, after the first round only 2 unique  
288 partitions were found, which themselves were very similar, with a normalised mutual information  
289 score of 0.98.

290 The final consensus partition resulted in mostly geographically organised communities, with high  
291 probability of schools in the same province being assigned the same community. In general, any  
292 preference of connection between schools of the same religious affiliation was not sufficient to  
293 overpower the strong geographical component in the communities. The exception was community  
294 9 (Figure 3), which was partially associated with the province of Zeeland (250 schools, 61% of  
295 the community). However, an additional 155 schools from other provinces were included in this  
296 community including 129 (31% of the community) from the protestant orthodox (Reformatorisch)  
297 denomination. In total 166 (41% of of the community) schools associated with the protestant  
298 orthodox denomination were included in this community from 6 different provinces, this represents  
299 79% of all schools of this denomination.

300 The pairwise probability that schools of the same province fell into the same partitioned  
301 communities was high with a mean of 0.75 (Table 1). In contrast the mean pairwise probability  
302 that schools of the same denomination were partitioned into the same communities was much  
303 lower with a mean of 0.28. There were two denominations which were excluded from the analysis,  
304 Jewish schools (Joods) and Moravian Church (Evangelische broedergemeenschap) schools,  
305 which both have only a small number of geographically clustered schools in the network resulting  
306 in pairwise probabilities of 1.0. Of the remaining, larger denominations, the Protestant Orthodox  
307 (Reformatorisch) schools had the highest pairwise probability of 0.55. In contrast, Athroposophic

308 schools (Antroposofisch), the other denomination associated with low MMR uptake, had much  
 309 lower pairwise probability of 0.12. (Table 1)

310 **Table 1.** Mean pairwise probability of being partitioned into the same community by School  
 311 denomination and Region.

| Denomination                |       |                 | Province      |       |                |
|-----------------------------|-------|-----------------|---------------|-------|----------------|
|                             | MPP   | 95% CI          |               | MPP   | 95% CI         |
| Reformatorisch              | 0.55  | (0.546, 0.554)  | Groningen     | 0.996 | (1.00, 0.996)  |
| Overige                     | 0.333 | (0, 0.776)      | Friesland     | 0.988 | (0.988, 0.989) |
| Hindoeïstisch               | 0.28  | (0.081, 0.479)  | Noord-Holland | 0.950 | (0.949, 0.950) |
| Gereformeerd                | 0.268 | (0.22, 0.317)   | Zeeland       | 0.887 | (0.885, 0.889) |
| Interconfessioneel          | 0.233 | (0.196, 0.271)  | Limburg       | 0.857 | (0.855, 0.858) |
| Gereformeerd<br>vrijgemaakt | 0.21  | (0.203, 0.217)  | Noord-Brabant | 0.784 | (0.783, 0.785) |
| Evangelisch                 | 0.149 | (0.105, 0.193)  | Drenthe       | 0.755 | (0.753, 0.758) |
| Rooms-Katholiek             | 0.147 | (0.147, 0.147), | Utrecht       | 0.724 | (0.722, 0.725) |
| Islamitisch                 | 0.147 | (0.132, 0.162)  | Flevoland     | 0.684 | (0.682, 0.686) |
| Openbaar                    | 0.129 | (0.128, 0.129)  | Overijssel    | 0.546 | (0.544, 0.547) |
| Protestants-Christelijk     | 0.125 | (0.124, 0.125)  | Zuid-Holland  | 0.442 | (0.441, 0.442) |
| Algemeen bijzonder          | 0.122 | (0.121, 0.122)  | Gelderland    | 0.343 | (0.342, 0.344) |
| Antroposofisch              | 0.118 | (0.11, 0.125)   |               |       |                |
| MEAN                        | 0.28  |                 |               | 0.75  |                |

312

313 *Network analysis*

314 On average each school was directly connected to 39.8 other schools through 225.9 contact pairs.

315 These values were much lower for primary schools, 27.5 and 122.1 respectively. Conversely

316 secondary schools had many more immediate neighbours with 109.7 connected schools through

317 813.9 contact pairs (figure 4 A). Orthodox Protestant (Reformateorisch) schools tended to have  
318 a higher ratio of contact pairs to the number of schools compared to the rest of the network,  
319 whereas Anthroposophic (Antroposofisch) schools had a more characteristic relationship  
320 between the number of neighbouring schools and contact pairs indicating more thinly distributed  
321 contact between a larger number of schools.

#### 322 Relative connectedness

323 For the majority of faith identities there is a positive homophily index, suggesting that households  
324 are more likely than expected to have children in two or more schools of the same faith identity  
325 than would be expected at random (figure 4 B).

326 The four faith identities with the highest CHI were Orthodox Protestant, Athroposophic, Roman  
327 Catholic and Mainstream Protestant, With CHI ranging from 0.62 to 0.12. Notably the two school  
328 identities with the highest Coleman Index were Orthodox Protestant (Reformatorisch)  
329 (Reformatorisch) (BH = 0.63, CHI= 0.62) and Anthroposophic (Antroposofisch) (BH = 0.25, CHI  
330 = 0.24), which are the two faith identities with populations who systematically refuse vaccination  
331 (Figure 4).

#### 332 Distances across the network

333 The mean ratio of network to geographic distance was 3.09 pairs<sup>-1</sup> km<sup>-1</sup> for the whole network,  
334 0.54 pairs<sup>-1</sup> km<sup>-1</sup> for Orthodox Protestant (Reformatorisch), 3.82 pairs<sup>-1</sup> km<sup>-1</sup> for Anthroposophic  
335 (Antroposofisch), 3.75 pairs<sup>-1</sup> km<sup>-1</sup> for Roman Catholic and 3.17 pairs<sup>-1</sup> km<sup>-1</sup> for mainstream  
336 Protestant. This indicates that The Orthodox Protestant (Reformatorisch) faith identity alone forms  
337 extended chains of schools strongly linked through households, whereas the other faith identities  
338 are generally as connected as any schools in the whole network.



339 The scatter plots of network distance against geographic distance revealed that in both cases  
340 network paths were shorter between the Orthodox protestant (Reformatorisch) and  
341 Anthroposophic (Antroposofisch) schools than between randomly selected geographically  
342 equivalent schools.

343 The distance ratio (network distance divided by geographic distance) distribution was lower for  
344 Orthodox Protestant (Reformatorisch) schools and Anthroposophic (Antroposofisch) schools  
345 than their comparison samples. With mean distance ratios of  $0.54 \text{ pairs}^{-1} \text{ km}^{-1}$  and  $3.83 \text{ pairs}^{-1}$   
346  $\text{km}^{-1}$  for Orthodox Protestant (Reformatorisch) and Anthroposophic (Antroposofisch) schools  
347 respectively and  $5.18 \times 10^{-3}$  and  $4.81 \times 10^{-3}$  for their respective comparators (Figure 4).

#### 348 *Simulation studies*

349 Using the baseline model (National school data contact network and school level vaccine uptake  
350 estimates), 1000 outbreak simulations with the initial schools set to the two schools first identified  
351 in the 2013 outbreak resulted in a mean of 23,497 (23,340 – 24,267 IQR) infections. The  
352 geographical distribution of cases was broadly consistent with the reported cases in 2013/14.  
353 There was a high likelihood of cases being reported in PC4 areas in the centre of the country and  
354 the southwest. There was also a high likelihood of infections in a small region in the north of the  
355 country (Figure 5).

356 When Alternative model 1 was used, (national school data in combination with the vaccination  
357 uptake in schools estimated from PC4 level vaccine uptake), the mean final size of the outbreaks  
358 was 259 (25 – 313 IQR). The cases were distributed in a narrow strip, with a high frequency of  
359 cases in the region from the south west region to the north east of the central region (Figure 5).

360 When Alternative model 2 was used (the spatially derived contact network and school level  
361 vaccine uptake estimates), the final size of the outbreak was 1241 (207 – 1619 IQR) cases. The

362 majority of cases predicted occurred in schools in the central region of the country, with low  
363 probability of detecting infection in any other regions (figure 5D).

364 Using the unweighted ROC, the mean sensitivity (proportion of PC4s where cases reported that  
365 were predicted by the model) was 0.84, 0.28 and 0.18, for the baseline model, alternative model  
366 1 and alternative model 2 respectively (Figure 5D). The mean specificity (proportion of PC4s  
367 where cases were predicted that also had cases reported) was 0.40, 0.54 and 0.57 for baseline  
368 model, alternative model 1 and alternative model 2 respectively.

369 Considering the weighted ROC. The mean sensitivity was 0.94, 0.38 and 0.23 for the baseline  
370 model, alternative model 1 and alternative model 2 respectively (Figure 5E). The mean specificity  
371 was 0.94, 0.91 and 0.91 for School data network with school vaccination, Spatial network with  
372 school vaccination and School data with PC4 level vaccination respectively.

373 *Outbreak size by school where the outbreak is initiated.*

374 The overall risk posed by an outbreak in each particular school was quantified by finding the  
375 distribution of final outbreak size. For both the school data and spatial networks, the majority of  
376 schools had a very low mean outbreak size as no sustainable transmission was observed in any  
377 simulation.

378 For the full network model, the maximum mean outbreak size was 145 schools and 23,505  
379 children and was associated with a Orthodox Protestant (Reformatorisch) school (Figure 6). In  
380 general, Orthodox Protestant (Reformatorisch) schools generated large outbreaks and were  
381 particularly high for schools with very low vaccination coverage. Outbreaks seeded in  
382 Anthroposophic (Antroposofisch) schools generally remained much smaller, with a maximum of  
383 3 schools and 462 children.

384 Outbreaks simulated on alternative model 2, with a spatially derived network, were generally  
385 much smaller. There was a trend with vaccine uptake, however there remained schools where  
386 vaccine uptake was low that still only seed very small outbreaks. The schools that seeded the  
387 largest outbreaks using alternative model 2 had a mean of 17 infected schools and 4,916 children  
388 infected. The Orthodox Protestant (Reformatorisch) schools seeded the largest outbreaks.  
389 However, the difference between Orthodox Protestant (Reformatorisch) and Anthroposophic  
390 (Antroposofisch) schools was much less substantial than for the full network model with a number  
391 of Anthroposophic (Antroposofisch) schools seeding outbreaks greater than that predicted by the  
392 model derived from the school data, with a maximum of 14 schools and 3,751 children. Notably  
393 the some Anthroposophic (Antroposofisch) schools seeded outbreaks comparable to those  
394 seeded by Orthodox Protestant (Reformatorisch) schools with similar vaccine uptake.

395

396

## 397 **Discussion**

398 We used a national school-household network including primary and secondary schools that  
399 represent >99% of school aged children in the Netherlands as a framework to quantify the  
400 outbreak risk of measles given observed vaccine-uptake by school. Doing so revealed that large  
401 close networks exist for specific faith identities, where the Orthodox Protestant schools connect  
402 households (and vice versa) over a large geographical distance in the Netherlands. Our network  
403 approach (parameterized on 2013 data) was able to predict accurately (sensitivity and specificity  
404 of both 0.94) the measles cases per PC4 level as observed in the 2013/14 outbreak in the  
405 Netherlands. The total incidence predicted by the model (approx. 23,500 infections) was markedly  
406 close to the estimates from literature (30,000 infections with 77% in school-aged children (4-17  
407 years old)). This demonstrates that by incorporating a school-household network on top of school-  
408 specific uptake data we can quantify outbreak-risks for measles, the overall outbreak size, the  
409 geographical spread of these outbreaks, and identify which particular school contributes to which  
410 degree to observed cases per PC4. Our analysis can be repeated on an annual basis utilising the  
411 data held in the vaccination registry, and administrative data of the department of education, so  
412 as to assist national and local public health teams in their assessment of risk and subsequently  
413 which groups of parents/children to target for national and local campaigns to reduce this risk.

414 Our analysis of the network of schools reveals that Orthodox Protestant are much more connected  
415 via households than would be expected geographically, evidenced by short network distances  
416 when compared to geographical distances. This property is not shared with Anthroposophic  
417 schools. The increased connectedness of Orthodox Protestant schools combined with low  
418 coverage of MMR creates large clusters of unvaccinated children, which would be expected to  
419 increase the risk of large outbreaks of Measles, Mumps and Rubella amongst this population.

420 Our simulation studies allowed us to quantify the implications of the clustering we identified in the  
421 network analysis. Our results have important implications for understanding the determinants of  
422 large outbreaks of measles in the Netherlands and their timing.

423 Firstly, our findings indicate that the distribution of unvaccinated children within particular schools,  
424 and the specific links between these schools greatly increase the potential for large outbreaks to  
425 occur. With these factors accounted for in the model, outbreaks similar to that observed in 2013/14  
426 can be simulated by accounting for school and household transmission only. This finding suggests  
427 that, in a population with immunity provided only by vaccination, outbreaks have a clear  
428 determinable reach, which is not reliant on chance encounters or rare long-range transmission  
429 events.

430 Secondly, our evaluation of the school-network highlights the difference between orthodox  
431 protestant and anthroposophic schools in how they interact with schools of their own  
432 denomination compared to the rest of the network. This provides a mechanistic explanation for  
433 the difference in outbreaks observed in the orthodox-protestant and anthroposophic communities  
434 in the past, where those in anthroposophic communities have remained relatively small (a small  
435 number of schools), whereas the outbreak in 2013 (largely in the orthodox-protestant community)  
436 was much larger [17,20].

437 Thirdly, it is evident from the degree distributions of primary and secondary schools that  
438 secondary schools are more connected on the network, this is consistent with observations of the  
439 school network in England, UK. This suggests that secondary schools may play a more  
440 substantial role in determining the spatial distribution of measles outbreaks than primary schools  
441 - a property that could be explored further in future work.

442 Further, since the variation in outbreak size is due to structural differences in the population, it is  
443 likely that future outbreaks in these communities would follow similar patterns, if the structure of  
444 the school system remains comparable in years to come.

445 Our approach made some important simplifying assumptions that the majority of transmission of  
446 measles between children occurs between contacts that either reside in the same home or attend  
447 the same school.

448 First, the model made some assumptions about transmission routes in the population. The model  
449 does not account for possible transmission between children outside school and household (e.g.  
450 sport, church activities, or assumes that these contacts can still follow school networks) and the  
451 model does not take into account transmission outside of the school-aged population. Adults and  
452 preschool-age infants are likely to contribute to transmission to some degree. These neglected  
453 routes of transmission could potentially influence transmission dynamics in a way that this model  
454 cannot capture. In 2013/14 there were 438 cases (19%) in children between 1 and 4, lower than  
455 the 819 (30%) and 868 (32%) cases in 5-9 and 10-14-year-old age groups respectively,  
456 suggesting less transmission within pre-school age than school aged children[20]. The presence  
457 of pre-school institutions in the network would provide additional connectivity on the network  
458 which may increase transmission opportunities, particularly between primary schools, however  
459 since the contribution of primary schools to connectivity in the network, it might be expected that  
460 pre-school settings, which tend to be smaller would provide limited additional transmission  
461 opportunity compared to the current network.

462 Secondly, our model does not simulate within-school transmission dynamics, but instead  
463 assumes a deterministic final size approximation [34], which occurs with a probability determined  
464 by the effective reproduction number in that school. This cannot capture the contribution of

465 outbreaks that do not reach sustainable transmission within schools, but still represent some small  
466 risk in terms of infecting other schools with the few pupils that are infected.

467 Finally, the model works purely on a 'generational' basis, with no explicit temporal element. This  
468 restricts its use to modelling the overall incidence of an outbreak without modelling the temporal  
469 dynamics. It is the case that transmission would only occur through other routes (not schools)  
470 during school holidays and weekends, for example. This cannot be captured in simulations with  
471 the model in its current form.

472 These limitations, however, do not detract from the findings that the school system provides a  
473 system of contact that can facilitate large outbreaks amongst unvaccinated children in the  
474 Orthodox Protestant (Reformatorisch) population but not amongst children in Anthroposophic  
475 schools.

476 Further analysis of this network could allow study of other infectious diseases such as mumps  
477 and rubella, which are also prevalent amongst school-aged children within the same socio-  
478 religious populations. The model could also be extended to analyse outbreaks of influenza, where  
479 a large degree of transmission occurs within school age children. Another use of this framework  
480 could be to evaluate the effectiveness of various other intervention strategies, such as school  
481 closure. This method could also be applied in other settings where vaccine uptake is strongly  
482 related to particular social groups [9], this relies on detailed school data being made available.

## 483 **Conclusion**

484 Our results indicate that important correlations between religious faith and vaccination refusal in  
485 the Netherlands may lead to large clusters of children who are at high risk of measles infection,  
486 through school and household contact. We found that groups associated with low vaccine uptake,  
487 the Orthodox Protestant Church and the Anthroposophic community displayed substantial  
488 homophily on the school network, indicating higher degree of connectedness than to other

489 schools. By explicitly modelling connections, we can provide important insights into the  
490 epidemiology of measles in the Netherlands and why it may vary between socio-religious groups.  
491 The results of our simulation studies suggest that the network improves our model's ability to  
492 describe observed epidemiology from previous outbreaks. High and long-range network  
493 connectedness between Orthodox Protestant schools revealed in our network analysis leads to  
494 larger outbreaks in this community compared to Anthroposophic schools, between whom  
495 connectivity on the network is weaker. This framework provides a basis for evaluating risk of large  
496 outbreaks of measles in the Netherlands and could be further developed to aid future outbreak  
497 response.

#### 498 **List of abbreviations**

499 DUO the Education Executive Agency in the Netherlands

500 HI / CHI Homophily index / Coleman Homophily Index

501 IQR Interquartile Range

502 MMR The Measles, Mumps and Rubella Vaccine

503 MPP Mean Pairwise Probability

504 OSIRIS The Netherlands National registry of reportable infectious disease

505 PC4 Four digit postcode

506 RIVM National Institute for Public Health and the Environment

507 ROC / wROC Receiver Operating Characteristic / Weighted Receiver Operating Characteristic

508

#### 509 **Declarations**

510 The authors declare no conflicts of interest

511

#### 512 **Ethics approval**



513 Ethical approval was obtained from the London School of Hygiene and Tropical Medicine (16028-  
514 1), this included the use of the data provided by DUO as well as OSIRIS. Data was prepared  
515 within the ministry, and only cumulative links per school were shared with us.

#### 516 **Consent for publication**

517 Not applicable

#### 518 **Availability of data and materials**

519 The code and school network data is available at [github.com/jdmunday/SchoolsMealesNL](https://github.com/jdmunday/SchoolsMealesNL). The  
520 measles case data is available on request: [datastewards@rivm.nl](mailto:datastewards@rivm.nl). School population statistics  
521 are publicly available from: [https://www.duo.nl/open\\_onderwijsdata/index.jsp](https://www.duo.nl/open_onderwijsdata/index.jsp). The Measles case  
522 data is available on request from RIVM: [osiris.aiz@rivm.nl](mailto:osiris.aiz@rivm.nl)

#### 523 **Competing interests**

524 The authors declare that they have no competing interests.

#### 525 **Funding**

526 JM, AJvH and KEA received funding from the National Institute for Health Research Health  
527 Protection Research Unit (NIHR HPRU) in immunisation at the London School of Hygiene &  
528 Tropical Medicine in partnership with Public Health England. The views expressed are those of  
529 the authors and not necessarily those of the UK National Health Service, the UK NIHR, the UK  
530 Medical Research Council, the UK Department of Health or UK Health Security Agency. The  
531 remaining authors received no specific funding for this research.

532

#### 533 **Authors contributions**

534 JDM, KEA and AJVH, conceived of and planned the analysis; JDM performed the main analysis  
535 with supervision from KEA and AJVH and scientific input from KEA, DK, MM, EF, SH, JW and  
536 AJVH. MM and EF provided data for the construction of the school network. JDM wrote the

537 manuscript. All authors edited and reviewed the manuscript. All authors read and approved the  
538 final manuscript.

### 539 **Acknowledgements**

540 The authors wish to thank members of the NIHR HPRU in immunisation and CMMID at LSHTM  
541 and the Infectious Disease Modelling Unit at RIVM for feedback. In particular the authors would  
542 like to thank Mark Jit, Petra Klepac, Sebastian Funk, Ada Collis Munday, Leon Danon and John  
543 Read for their insightful discussions.

### 544 **Additional Files**

545 Supplementary Figures

### 546 **References**

- 547 1. Roberts L. Is measles next? *Science*. 2015;348: 958–61, 963.
- 548 2. Baugh V, Figueroa J, Bosanquet J, Kemsley P, Addiman S, Turbitt D. Ongoing measles  
549 outbreak in Orthodox Jewish community, London, UK. *Emerg Infect Dis*. 2013;19: 1707–  
550 1709.
- 551 3. Stein-Zamir C, Abramson N, Shoob H, Zentner G. An outbreak of measles in an ultra-  
552 orthodox Jewish community in Jerusalem, Israel, 2007--an in-depth report. *Euro Surveill*.  
553 2008;13: 5–6.
- 554 4. Cohen BJ, McCann R, van den Bosch C, White J. Outbreak of measles in an Orthodox  
555 Jewish community. *Wkly releases (1997–2007)*. 2000;4. doi:10.2807/esw.04.03.01675-en
- 556 5. Lernout T, Kissling E, Hutse V, De Schrijver K, Top G. An outbreak of measles in orthodox  
557 Jewish communities in Antwerp, Belgium, 2007-2008: different reasons for accumulation of  
558 susceptibles. *Euro Surveill*. 2009;14. doi:10.2807/ese.14.02.19087-en
- 559 6. Firman N, Marszalek M, Gutierrez A, Homer K, Williams C, Harper G, et al. Impact of the  
560 COVID-19 pandemic on timeliness and equity of measles, mumps and rubella vaccinations  
561 in North East London: a longitudinal study using electronic health records. *BMJ Open*.  
562 2022;12: e066288.
- 563 7. Bedford H, Donovan H. We need to increase MMR uptake urgently. *BMJ*. 2022;376: o818.
- 564 8. Funk S, Knapp JK, Lebo E, Reef SE, Dabbagh AJ, Kretsinger K, et al. Combining  
565 serological and contact data to derive target immunity levels for achieving and maintaining

- 566 measles elimination. *bioRxiv*. bioRxiv; 2017. doi:10.1101/201574
- 567 9. Fournet N, Mollema L, Ruijs WL, Harmsen IA, Keck F, Durand JY, et al. Under-vaccinated  
568 groups in Europe and their beliefs, attitudes and reasons for non-vaccination; two  
569 systematic reviews. *BMC Public Health*. 2018;18: 196.
- 570 10. Liu F, Enanoria WTA, Zipprich J, Blumberg S, Harriman K, Ackley SF, et al. The role of  
571 vaccination coverage, individual behaviors, and the public health response in the control of  
572 measles epidemics: an agent-based simulation for California. *BMC Public Health*. 2015;15:  
573 447.
- 574 11. Nic Lochlainn LM, Woudenberg T, van Lier A, Zonnenberg I, Philippi M, de Melker HE, et  
575 al. A novel measles outbreak control strategy in the Netherlands in 2013-2014 using a  
576 national electronic immunization register: A study of early MMR uptake and its  
577 determinants. *Vaccine*. 2017;35: 5828–5834.
- 578 12. Klomp JHE, van Lier A, Ruijs WLM. Vaccination coverage for measles, mumps and rubella  
579 in anthroposophical schools in Gelderland, The Netherlands. *Eur J Public Health*. 2015;25:  
580 501–505.
- 581 13. Woudenberg T, Woonink F, Kerkhof J, Cox K, Ruijs WLM, van Binnendijk R, et al. The tip  
582 of the iceberg: incompleteness of measles reporting during a large outbreak in The  
583 Netherlands in 2013-2014. *Epidemiol Infect*. 2018;147: e23.
- 584 14. Woudenberg T, van Binnendijk RS, Sanders EAM, Wallinga J, de Melker HE, Ruijs WLM,  
585 et al. Large measles epidemic in the Netherlands, May 2013 to March 2014: changing  
586 epidemiology. *Euro Surveill*. 2017;22. doi:10.2807/1560-7917.ES.2017.22.3.30443
- 587 15. Klinkenberg D, van Hoek AJ, Veldhuijzen I, Hahné S, Wallinga J. Social clustering of  
588 unvaccinated children in schools in the Netherlands. *Epidemiol Infect*. 2022;150: e200.
- 589 16. Wallinga J, Heijne JCM, Kretzschmar M. A measles epidemic threshold in a highly  
590 vaccinated population. *PLoS Med*. 2005;2: e316.
- 591 17. van Velzen E, de Coster E, van Binnendijk R, Hahné S. Measles outbreak in an  
592 anthroposophic community in The Hague, The Netherlands, June-July 2008. *Euro Surveill*.  
593 2008;13. doi:10.2807/ese.13.31.18945-en
- 594 18. Hahne S, te Wierik MJM, Mollema L, van Velzen E, de Coster E, Swaan C, et al. Measles  
595 outbreak, the Netherlands, 2008. *Emerg Infect Dis*. 2010;16: 567–569.
- 596 19. van den Hof S, Meffre CM, Conyn-van Spaendonck MA, Woonink F, de Melker HE, van  
597 Binnendijk RS. Measles outbreak in a community with very low vaccine coverage, the  
598 Netherlands. *Emerg Infect Dis*. 2001;7: 593–597.
- 599 20. Woudenberg T, van Binnendijk RS, Sanders EAM, Wallinga J, de Melker HE, Ruijs WLM,  
600 et al. Large measles epidemic in the Netherlands, May 2013 to March 2014: changing  
601 epidemiology. *Euro Surveill*. 2017;22. doi:10.2807/1560-7917.ES.2017.22.3.30443
- 602 21. van den Hof S, Meffre CM, Conyn-van Spaendonck MA, Woonink F, de Melker HE, van  
603 Binnendijk RS. Measles outbreak in a community with very low vaccine coverage, the  
604 Netherlands. *Emerg Infect Dis*. 2001;7: 593–597.

- 605 22. De Cao E, Zagheni E, Manfredi P, Melegaro A. The relative importance of frequency of  
606 contacts and duration of exposure for the spread of directly transmitted infections.  
607 *Biostatistics*. 2014;15: 470–483.
- 608 23. Melegaro A, Jit M, Gay N, Zagheni E, Edmunds WJ. What types of contacts are important  
609 for the spread of infections?: using contact survey data to explore European mixing  
610 patterns. *Epidemics*. 2011;3: 143–151.
- 611 24. Munday JD, Sherratt K, Meakin S, Endo A, Pearson CAB, Hellewell J, et al. Implications of  
612 the school-household network structure on SARS-CoV-2 transmission under school  
613 reopening strategies in England. *Nat Commun*. 2021;12: 1942.
- 614 25. van Iersel SCJL, Backer JA, van Gaalen RD, Andeweg SP, Munday JD, Wallinga J, et al.  
615 Empirical evidence of transmission over a school-household network for SARS-CoV-2;  
616 exploration of transmission pairs stratified by primary and secondary school. *Epidemics*.  
617 2023;43: 100675.
- 618 26. DUO - Open onderwijsdata. In: duo.nl [Internet]. [cited 24 Jan 2024]. Available:  
619 [https://www.duo.nl/open\\_onderwijsdata/index.jsp](https://www.duo.nl/open_onderwijsdata/index.jsp)
- 620 27. Traag VA, Waltman L, van Eck NJ. From Louvain to Leiden: guaranteeing well-connected  
621 communities. *Sci Rep*. 2019;9: 5233.
- 622 28. Ronhovde RKDDRRP, Nussinov Z. An edge density definition of overlapping and weighted  
623 graph communities. 2013. doi:10.48550/ARXIV.1301.3120
- 624 29. Li Z, Zhang S, Wang R-S, Zhang X-S, Chen L. Quantitative function for community  
625 detection. *Phys Rev E Stat Nonlin Soft Matter Phys*. 2008;77: 036109.
- 626 30. Newman MEJ, Girvan M. Finding and evaluating community structure in networks. *Phys  
627 Rev E Stat Nonlin Soft Matter Phys*. 2004;69: 026113.
- 628 31. Aldecoa R, Marín I. Surprise maximization reveals the community structure of complex  
629 networks. *Sci Rep*. 2013;3: 1060.
- 630 32. Coleman J. Relational analysis: The study of social organizations with survey methods.  
631 *Hum Organ*. 1958;17: 28–36.
- 632 33. Donker T, Smieszek T, Henderson KL, Johnson AP, Walker AS, Robotham JV. Measuring  
633 distance through dense weighted networks: The case of hospital-associated pathogens.  
634 *PLoS Comput Biol*. 2017;13: e1005622.
- 635 34. Diekmann O, Heesterbeek JAP. *Mathematical Epidemiology of Infectious Diseases: Model  
636 Building, Analysis and Interpretation*. John Wiley & Sons; 2000.
- 637 35. Anderson RM, May RM. Directly transmitted infections diseases: control by vaccination.  
638 *Science*. 1982;215: 1053–1060.
- 639 36. van Rossum G. Python tutorial. 1995 Jan. Report No.: R 9526. Available:  
640 <https://ir.cwi.nl/pub/5007/05007D.pdf>
- 641 37. Hagberg A, Swart P, S Chult D. Exploring network structure, dynamics, and function using  
642 networkx. Los Alamos National Lab. (LANL), Los Alamos, NM (United States); 2008 Jan.

643 Report No.: LA-UR-08-05495; LA-UR-08-5495. Available:  
 644 <https://www.osti.gov/servlets/purl/960616>

645 38. Rossetti G, Milli L, Cazabet R. CDLIB: a python library to extract, compare and evaluate  
 646 communities from complex networks. Appl Netw Sci. 2019;4. doi:10.1007/s41109-019-  
 647 0165-9

648 39. Oliphant TE. Python for Scientific Computing. Comput Sci Eng. 2007;9: 10–20.

649  
 650

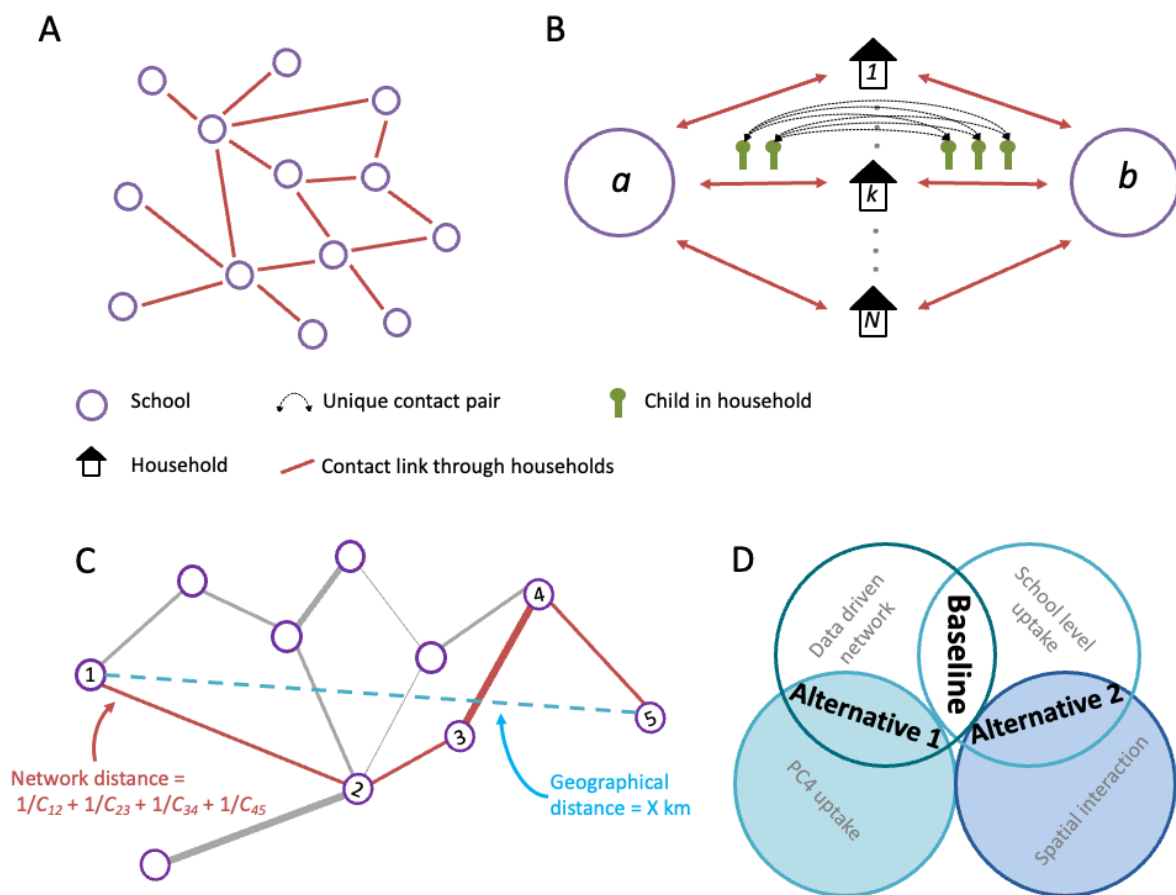

651

652 **Figure 1** A) Network of schools constructed such that schools are connected when contact is made  
 653 between pupils of different schools within a household. B) The strength of contact between schools is  
 654 quantified by calculating the number of unique contact pairs (one child in each school). The number of  
 655 pairs per household is the product of the number of children who attend school *a* and the number of  
 656 children who attend school *b*. The total number of unique pairs is the sum of unique pairs in each  
 657 household with children attending both school *a* and *b*. Figure adapted from [24]. C) Calculation of

658 network distance between nodes 1 and 5 is the sum of the edges along the shortest path between those  
 659 nodes. D) Schematic of the components of the different network models. The baseline used the data  
 660 driven contact network and school level uptake. Alternative models: 1. Uptake based on four digit  
 661 postcode areas of the children who attend the school. 2. Interaction based on a spatial interaction kernel.  
 662

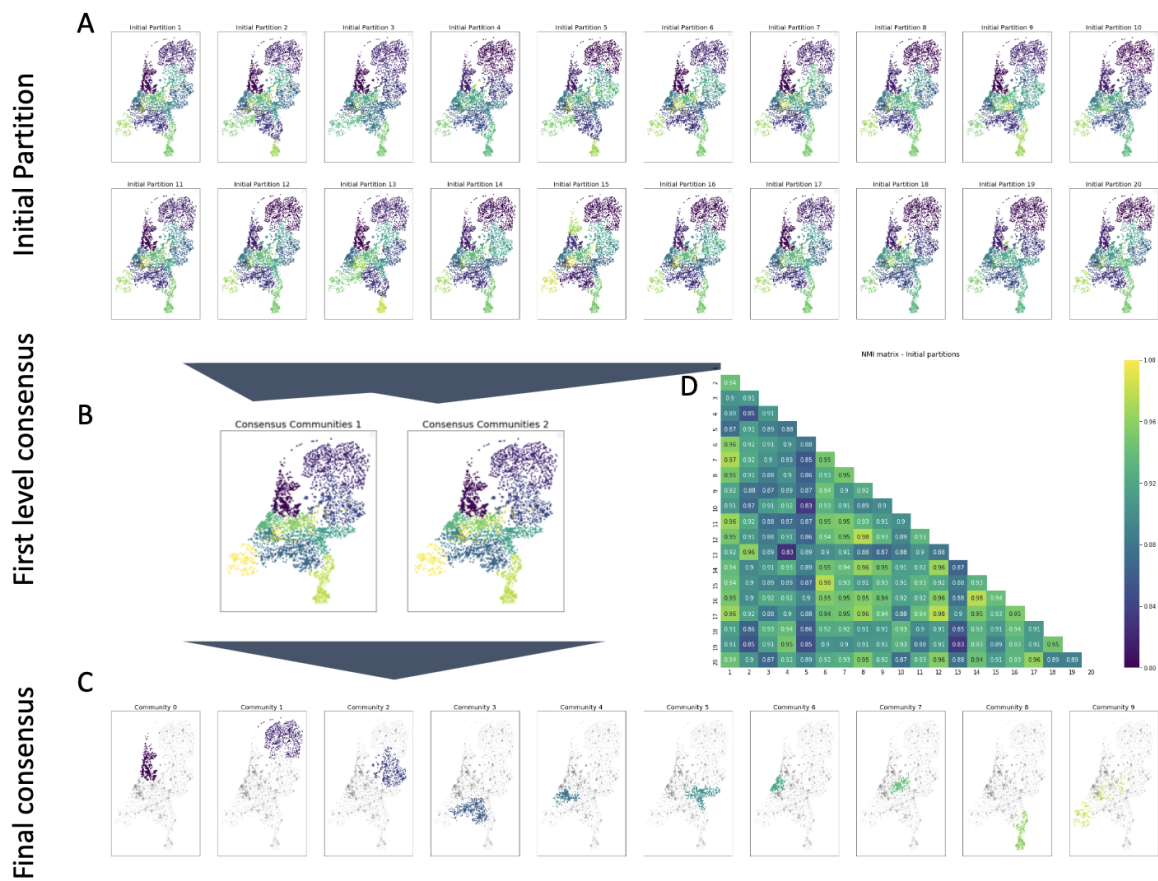

663  
 664 **Figure 2** Consensus partition - Community structure of the school network. A to C show the locations of  
 665 schools in the Netherlands, the colour of the markers indicates the community of schools in the partition.  
 666 The panels in A show the 20 initial partitions, B shows the partitions from the first round of the ensembling  
 667 algorithm. C shows each community in a separate panel in the final consensus partition, grey points show  
 668 the locations of other schools (not in the community in that panel). D shows a matrix normalised mutual  
 669 information (NMI) between the initial partitions.

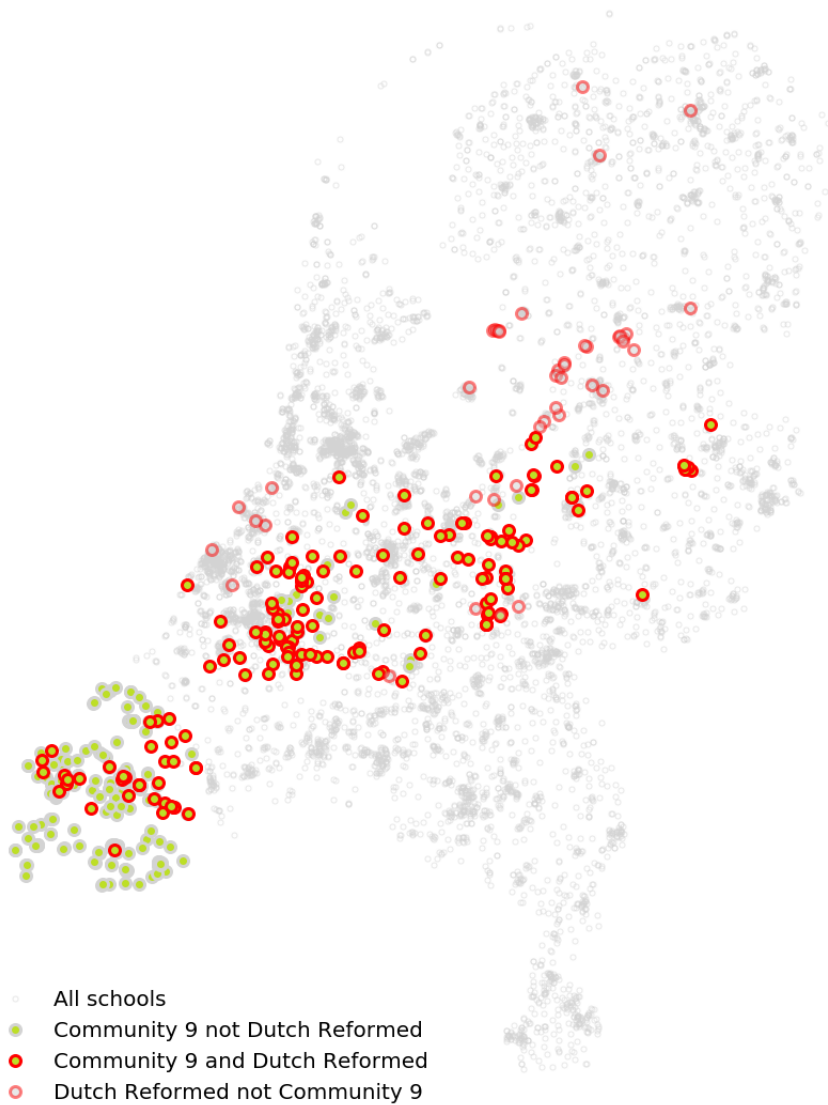

670

671 **Figure 3** Consensus partition community 9 which is primarily composed of schools in the Zeeland province

672 and Protestant Orthodox schools (Reformatorisch) spread across the Nation.

673

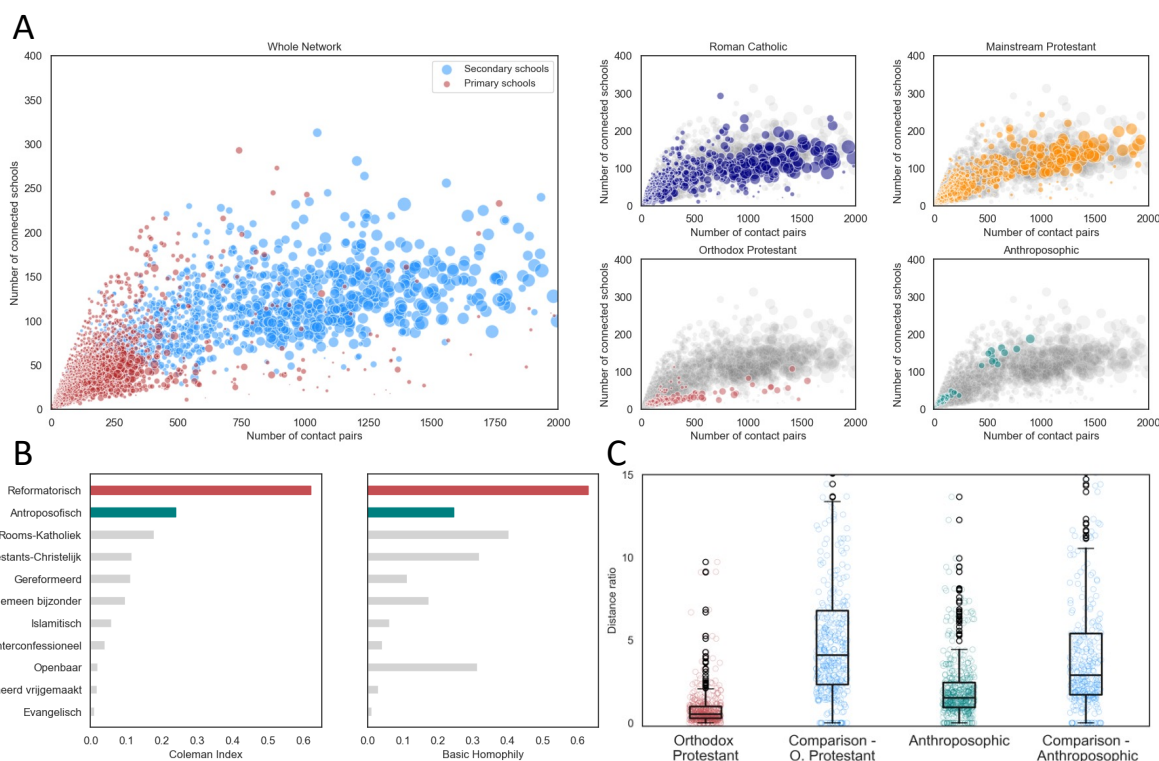

674

675 **Figure 4** A) The number of contact pairs connected to other schools against the number of connected  
 676 schools for each school in the network. The main panel shows the primary schools in red and secondary  
 677 schools in blue, the four panels on the right show the two largest school denominations (protestant and  
 678 catholic) alongside the Orthodox Protestant and Anthroposophic denominations, the rest of the schools in  
 679 the network are shown in grey for comparison. B) The 11 faith identities with the highest Coleman  
 680 Homophily Index (CHI). in the left panel bars show the CHI of each faith identity. In the right panel, bars  
 681 show the basic homophily of each faith identity. Red bars highlight the Orthodox Protestant  
 682 (Reformatorisch) and Anthroposophic (Antroposofisch) identity schools, where vaccination uptake is  
 683 known to be low. C) Boxplot of distance ratio for pairs of Orthodox Protestant (Reformatorisch) [Here  
 684 labelled “Reformed”] and Anthroposophic (Antroposofisch) schools and geographically equivalent sample  
 685 from the rest of the network.

686



687

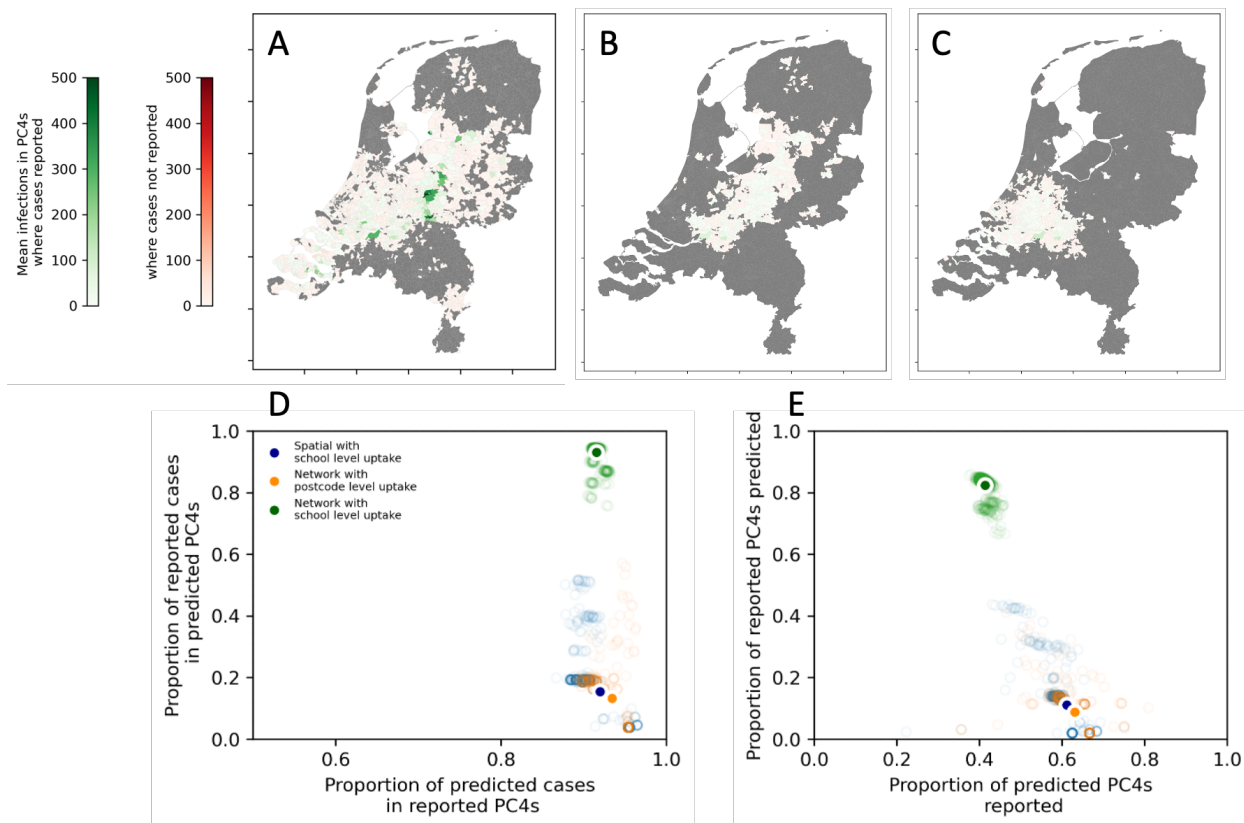

688

689 **Figure 5** Mean number of cases across 1000 simulated in each PC4 region with a reporting rate of 10%  
690 (from estimates in literature). A) the baseline model: School data network with school level uptake., B)  
691 Alternative model 1: School data network with PC4 level uptake, C) Alternative model 2: Spatial network  
692 with school level uptake D) weighted sensitivity and specificity and E) unweighted sensitivity and  
693 specificity of the baseline and alternative network models.

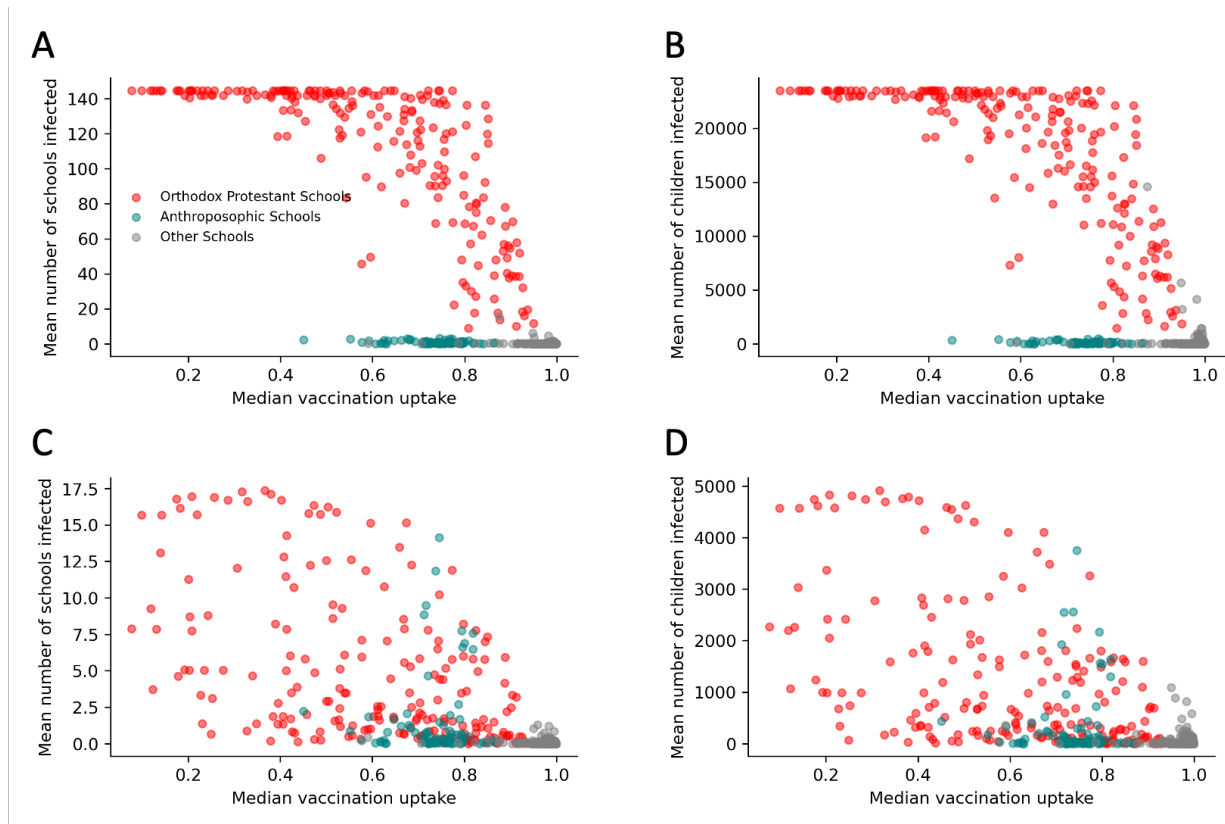

694

695 **Figure 6** Mean outbreak final size by school where outbreak is seeded. Red points indicate Orthodox  
696 Protestant (Reformatorisch) schools, green points indicate Anthroposophic (Antroposofisch)  
697 (Antroposofisch) schools, grey points indicate other schools. A) School data derived network- mean  
698 number of schools infected, B) School data derived network- mean number of children infected, C)  
699 Spatially derived model- mean number of schools infected, D) Spatially derived model- mean number of  
700 children infected.

A

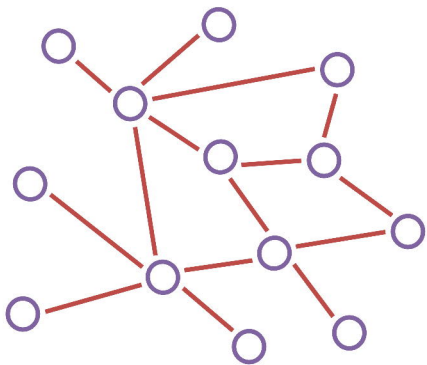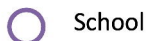

School

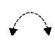

Unique contact pair

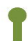

Child in household

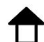

Household

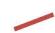

Contact link through households

B

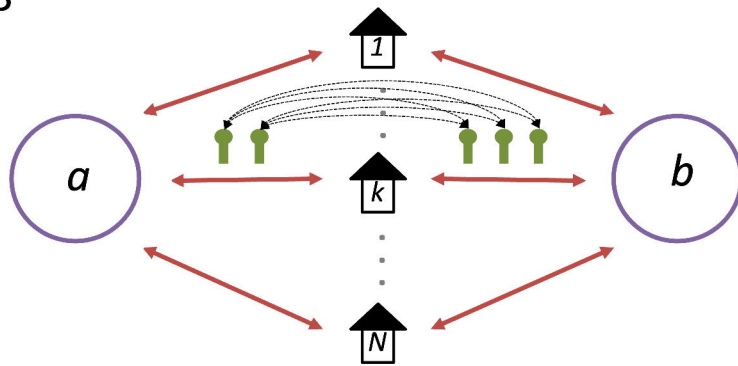

C

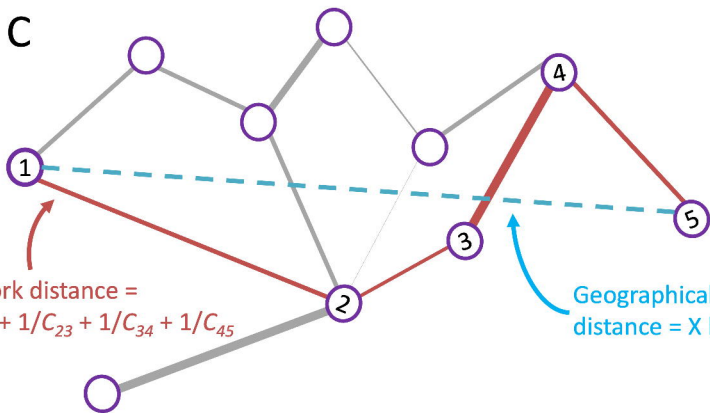

Network distance =  
 $\frac{1}{C_{12}} + \frac{1}{C_{23}} + \frac{1}{C_{34}} + \frac{1}{C_{45}}$

Geographical  
 distance = X km

D

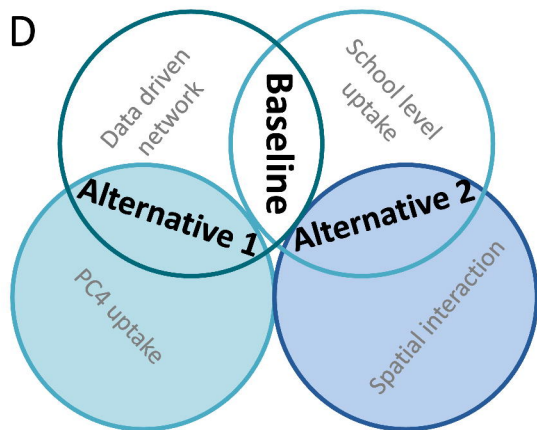



medRxiv preprint doi: <https://doi.org/10.1101/2024.02.20.24302866>; this version posted February 21, 2024. The copyright holder for this preprint (which was not certified by peer review) is the author/funder, who has granted medRxiv a license to display the preprint in perpetuity. It is made available under a [CC-BY 4.0 International license](https://creativecommons.org/licenses/by/4.0/).

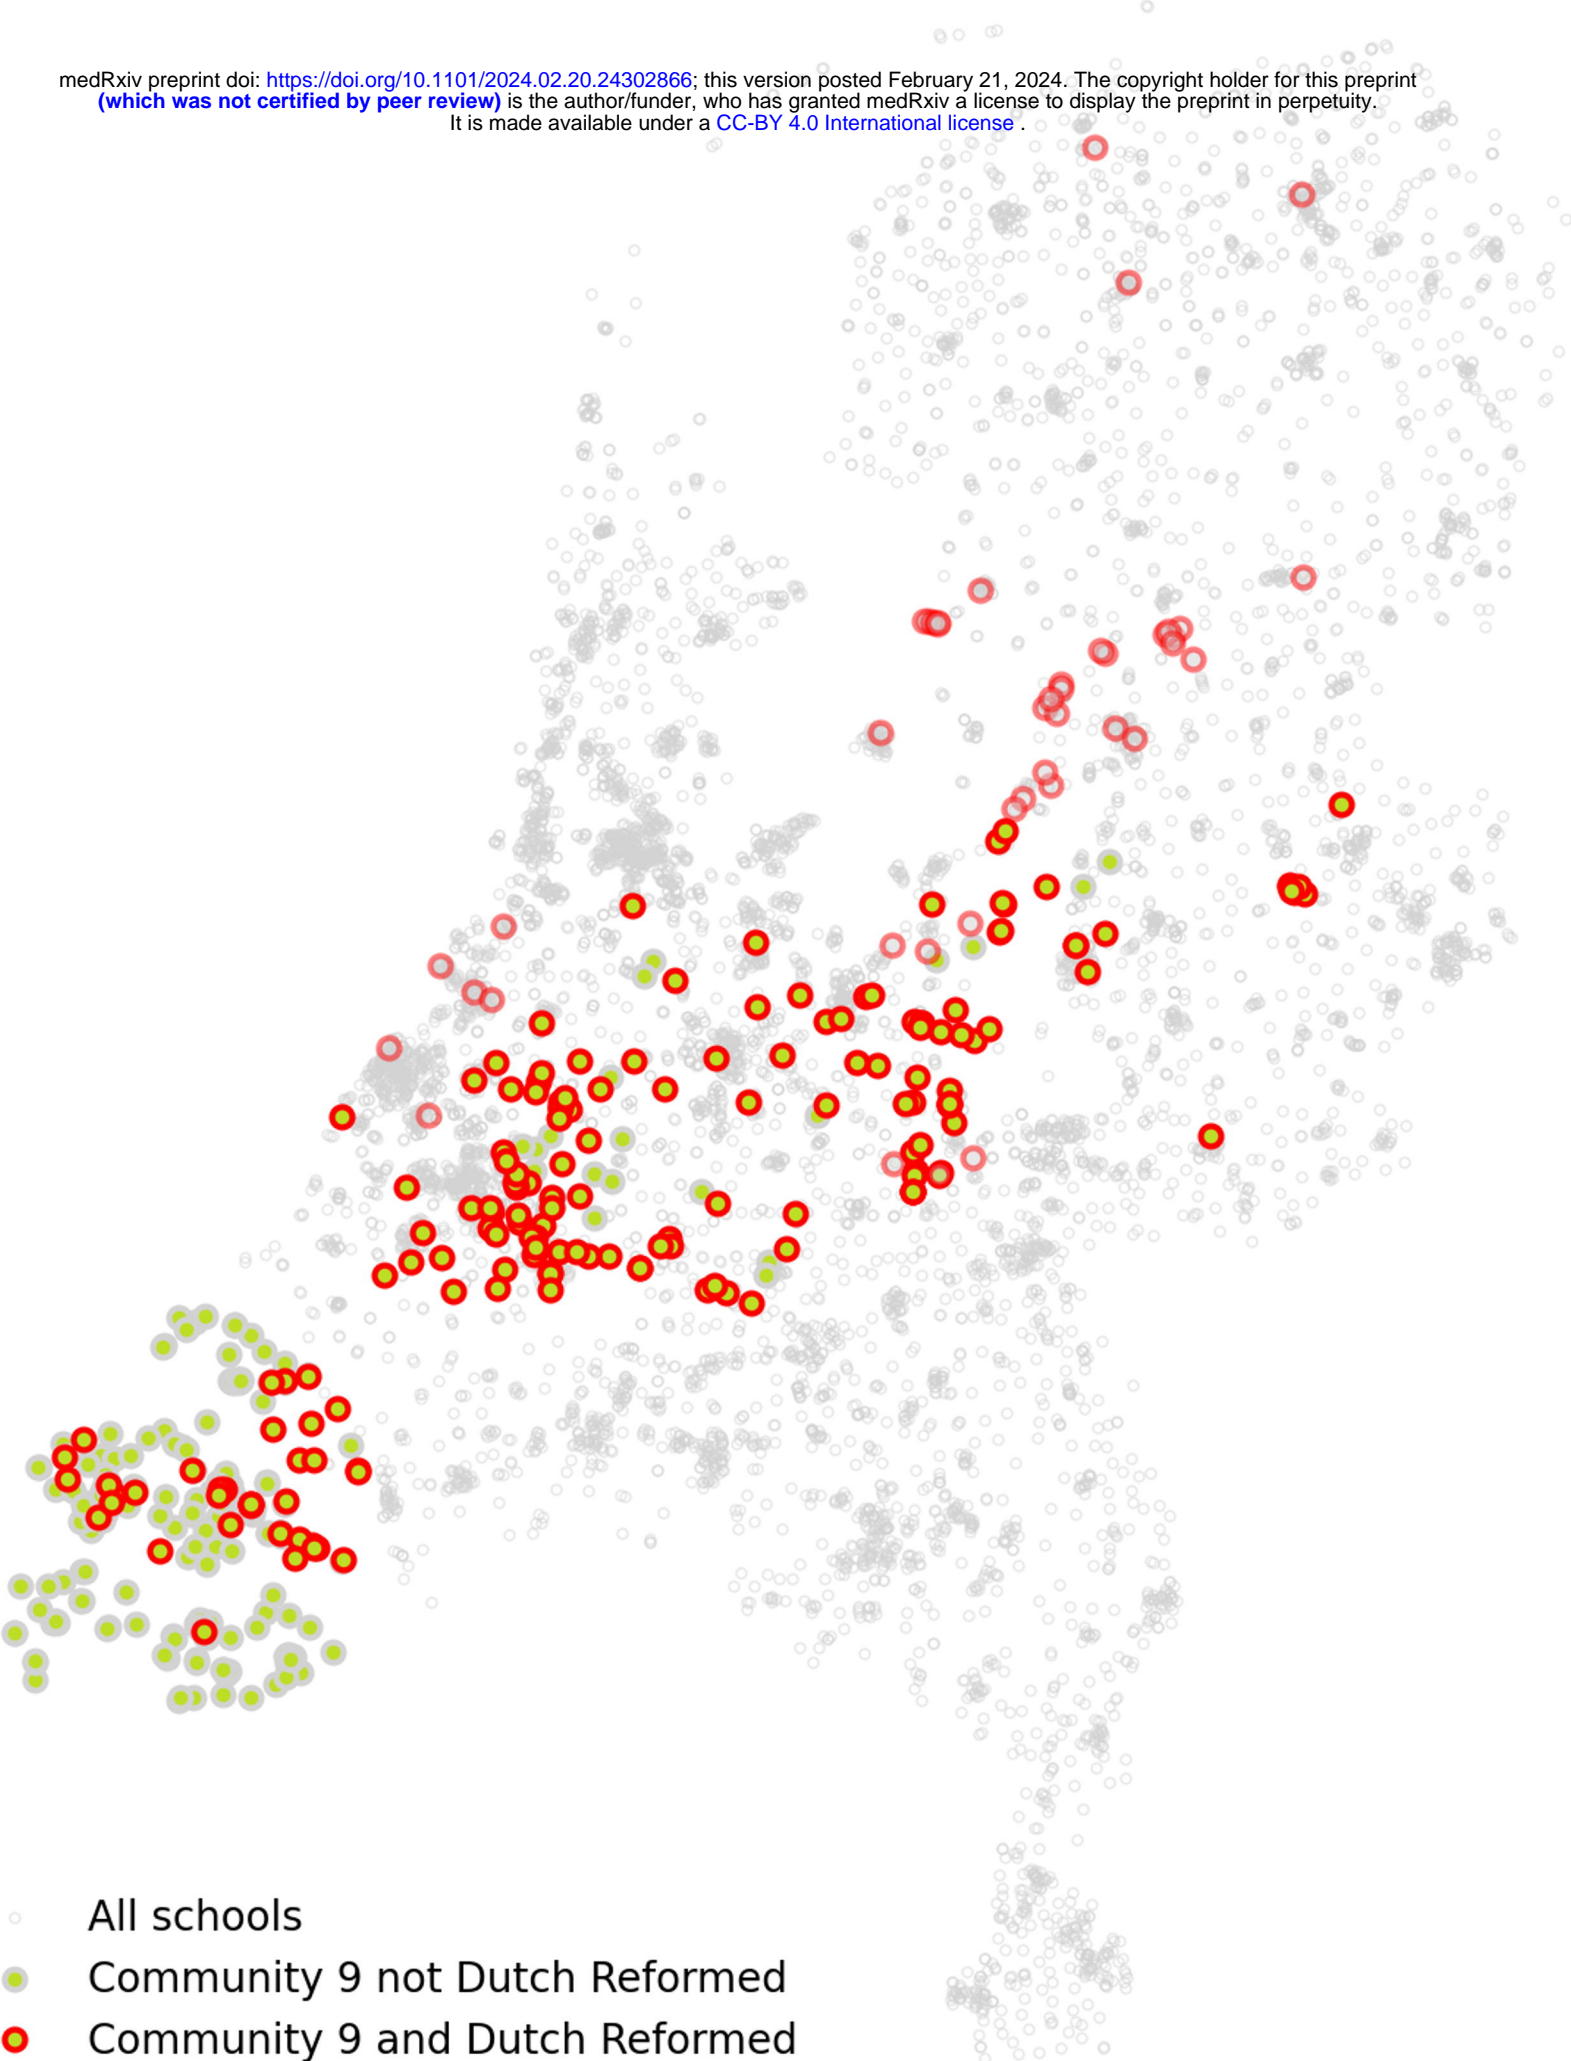

- All schools
- Community 9 not Dutch Reformed
- Community 9 and Dutch Reformed
- Dutch Reformed not Community 9

**A**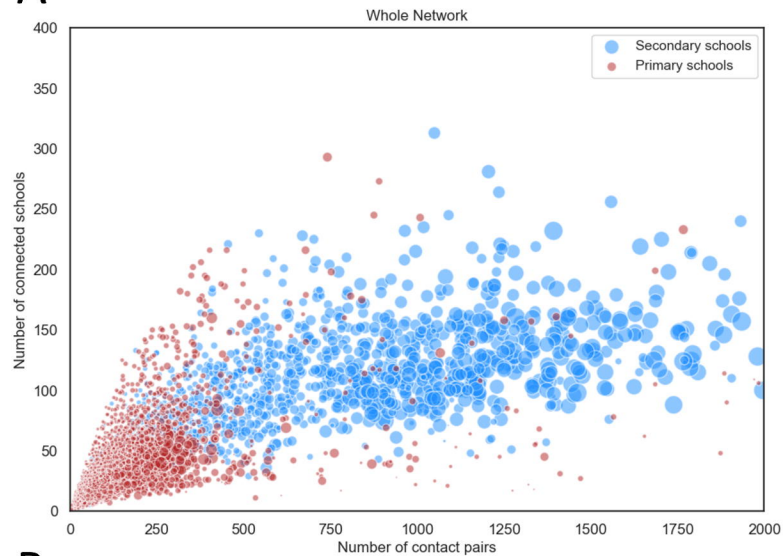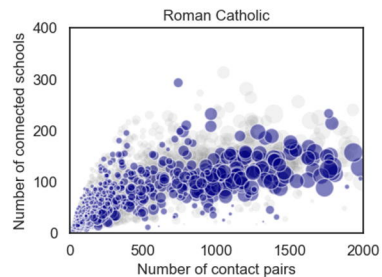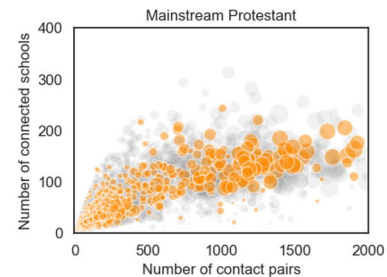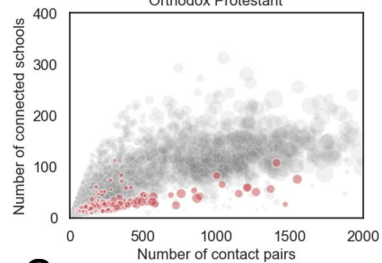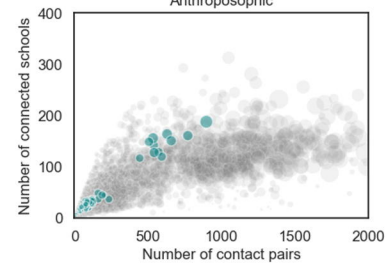**B**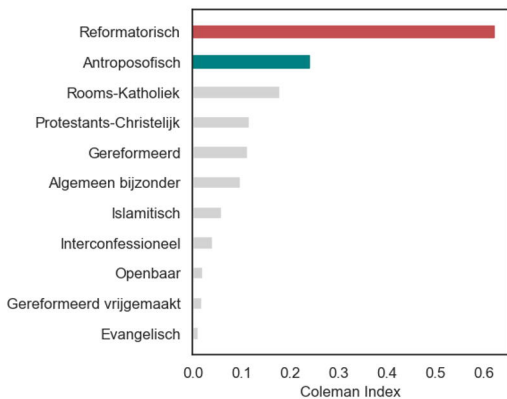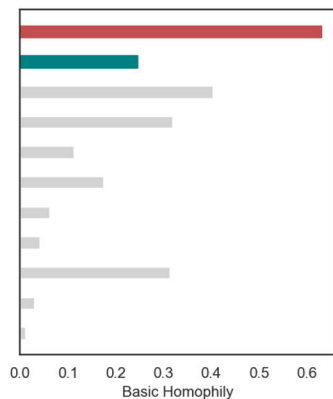**C**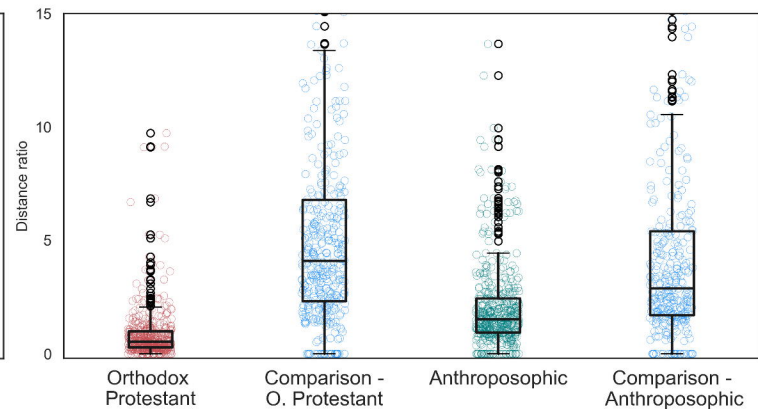

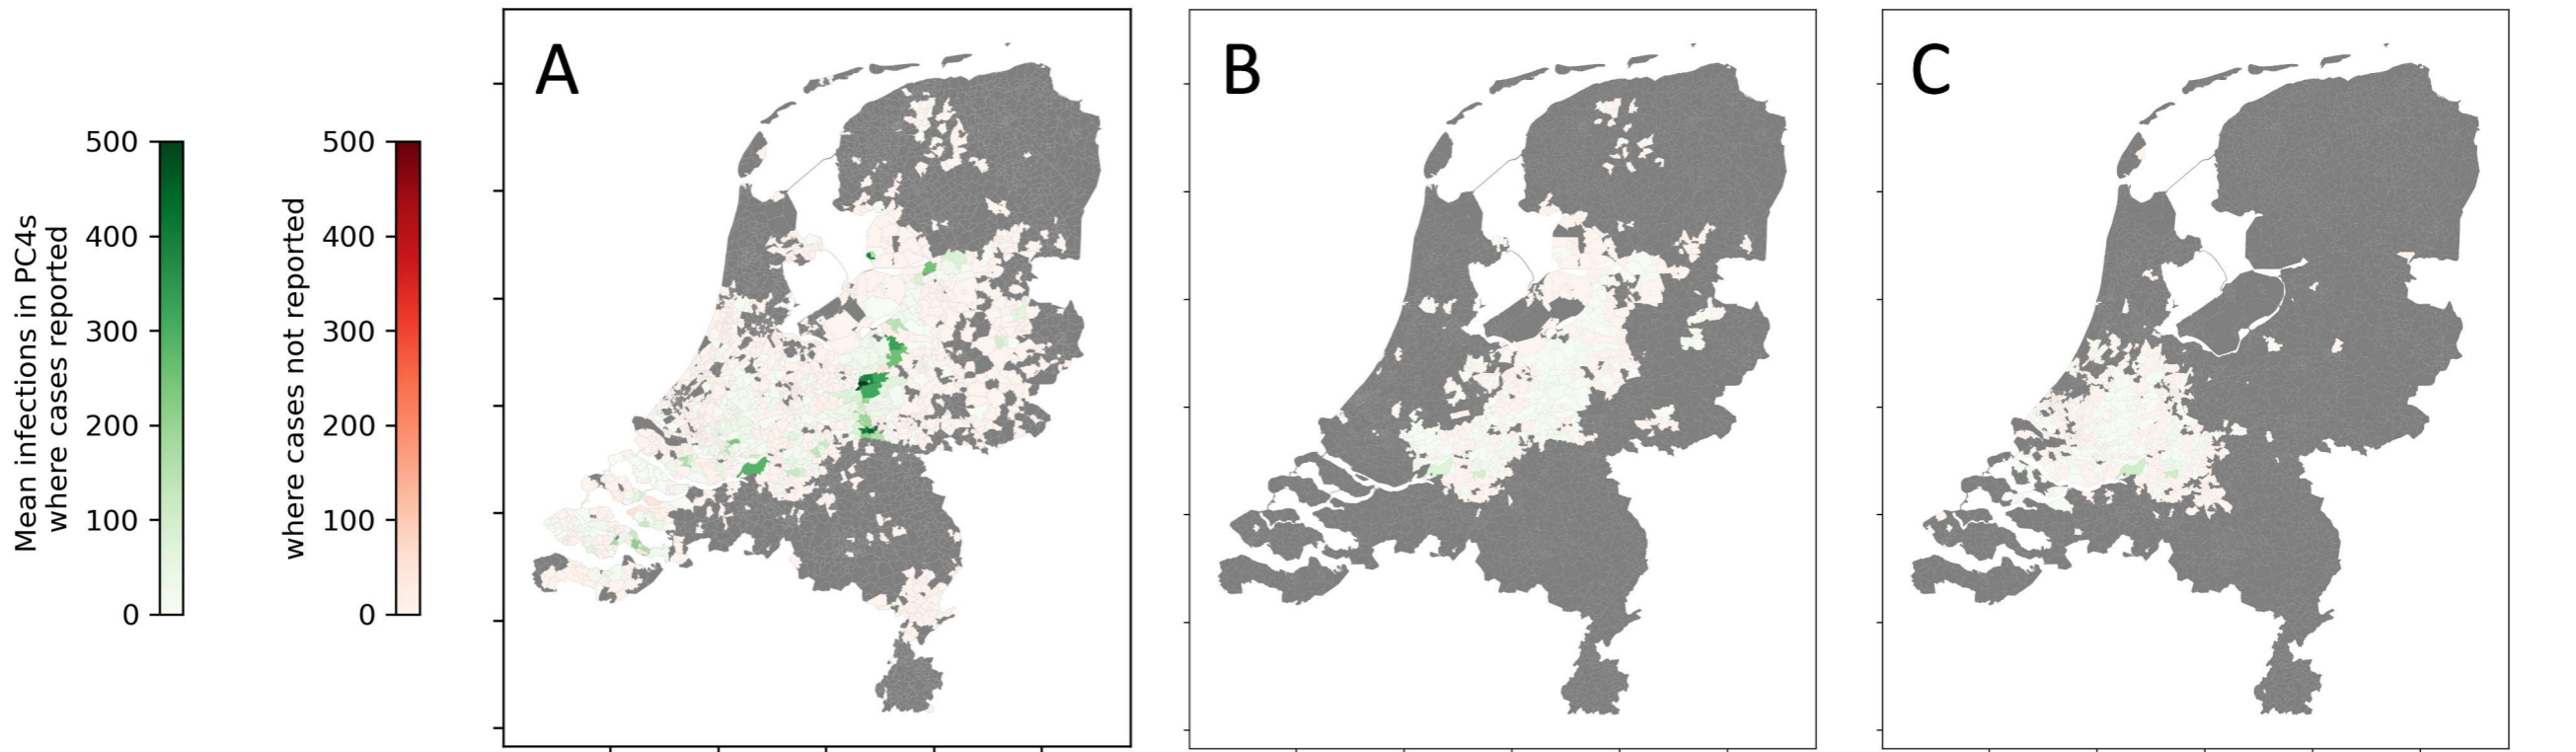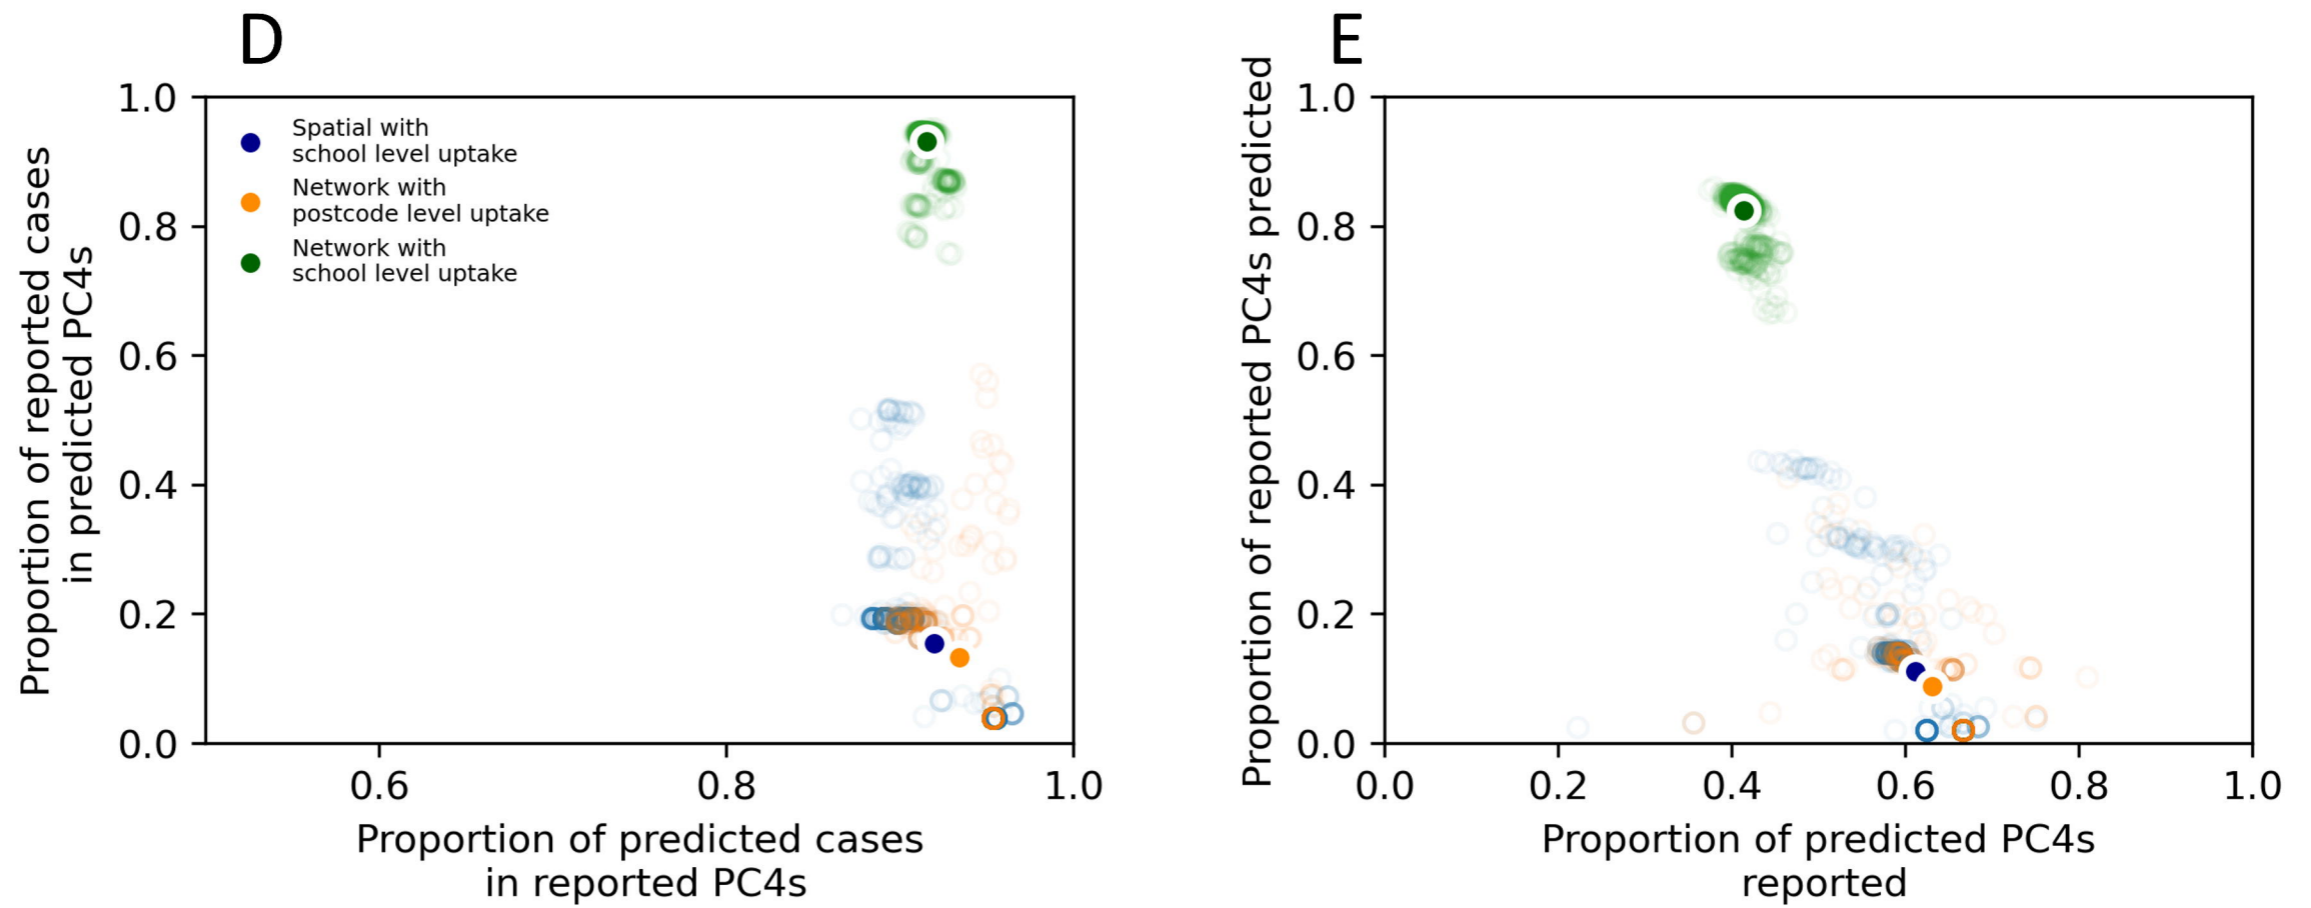

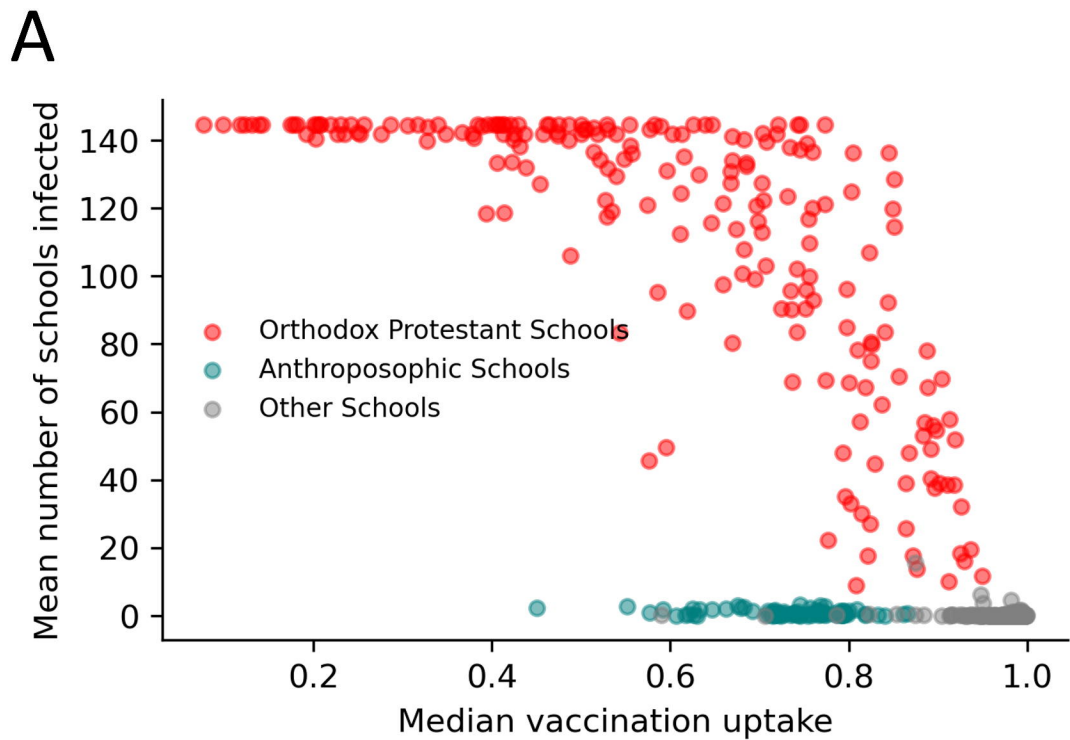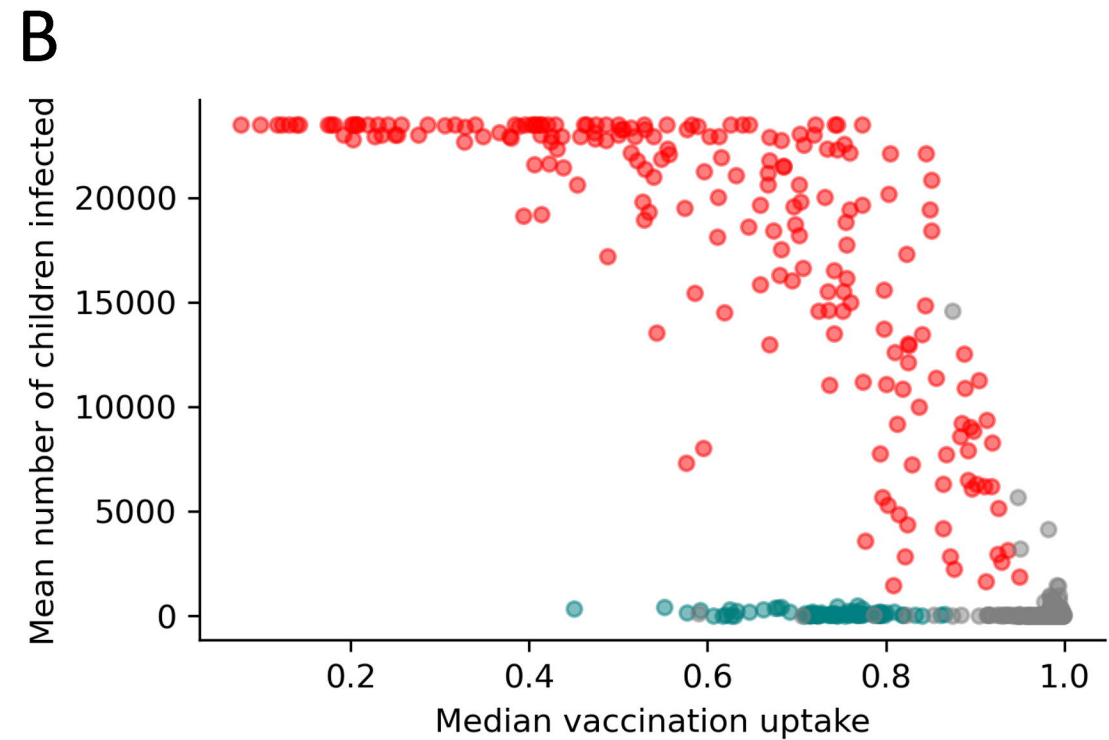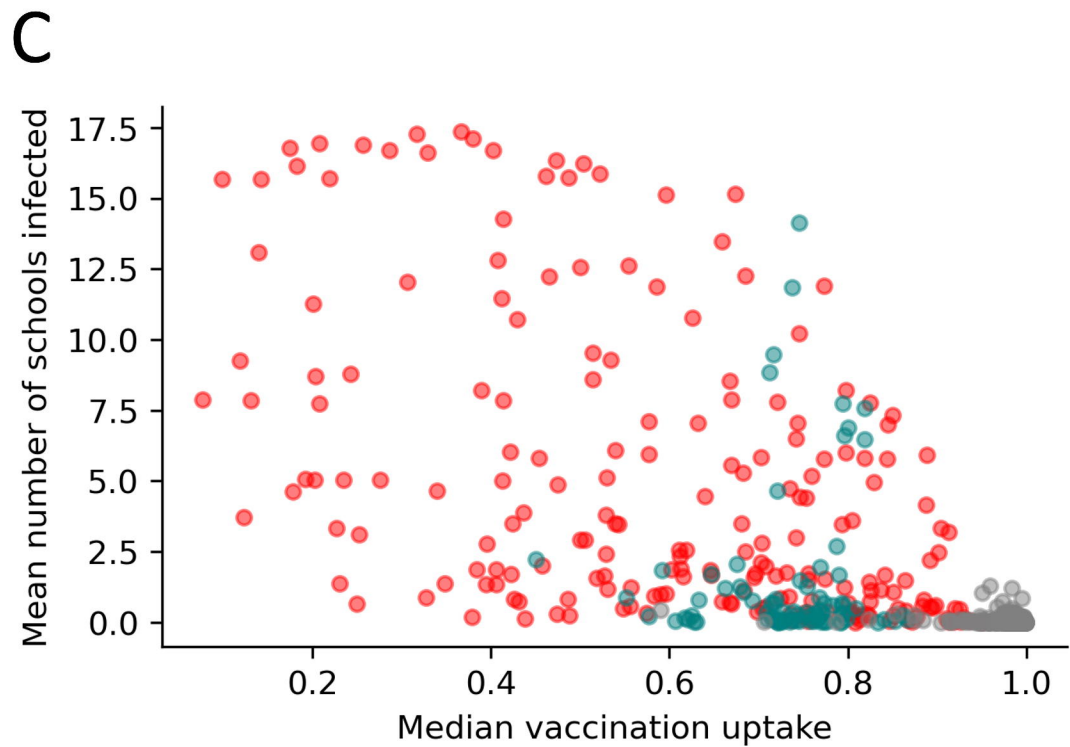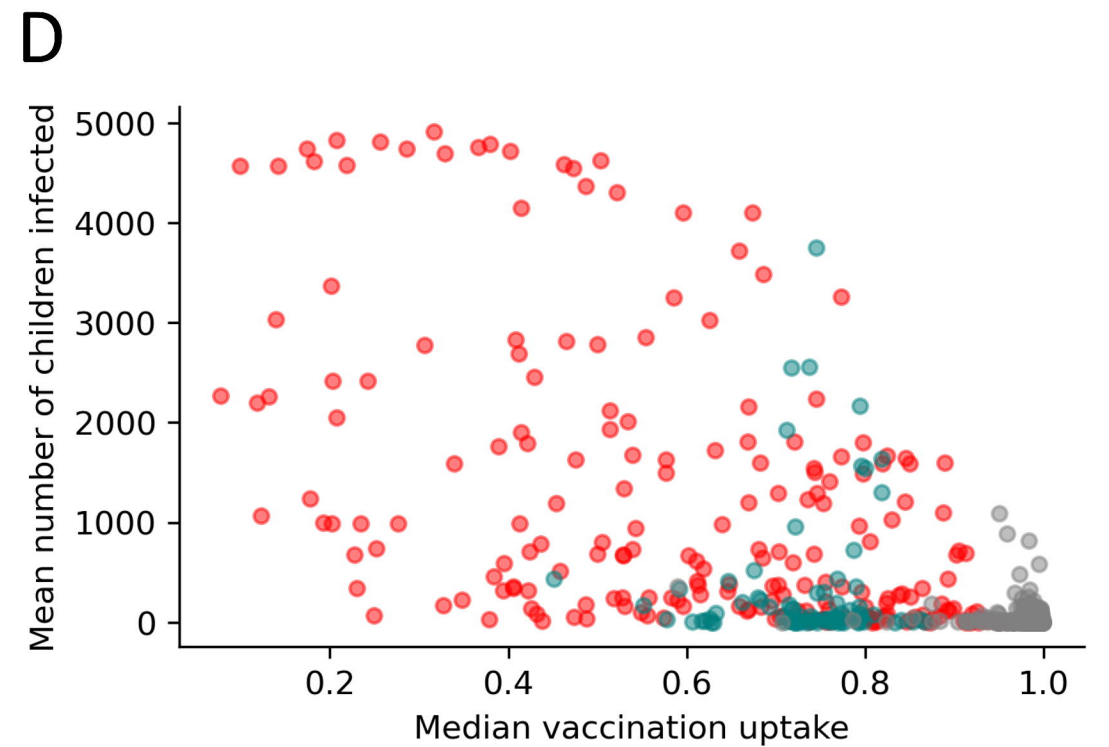

Source: https://medrxiv.org/content/10.1101/2024.02.20.24302866v1.full.pdf
